# Supplementary material for: Quantitative Systems Pharmacological Analysis of Drugs of Abuse Reveals the Pleiotropy of Their Targets and the Effector Role of mTORC1
Source: Front Pharmacol. 2019 Mar 8;10:191. doi: 10.3389/fphar.2019.00191 (PMC6418047; doi:10.3389/fphar.2019.00191)
Supplement: Supplementary file 1 [file Table_1.docx]

Supplementary Material

*for*

Quantitative systems pharmacological analysis of drugs of abuse reveals the pleiotropy of their targets and the effector role of mTORC1

Fen Pei†, Hongchun Li†, Bing Liu* and Ivet Bahar*

*Department of Computational and Systems Biology, School of Medicine,*

*University of Pittsburgh, PA, 15213, USA*

*** Correspondence:** Bing Liu liubing@pitt.edu and Ivet Bahar: bahar@pitt.edu

**†** These authors made equal contributions

# Supplementary Figures and Tables

## Supplementary Figures

| 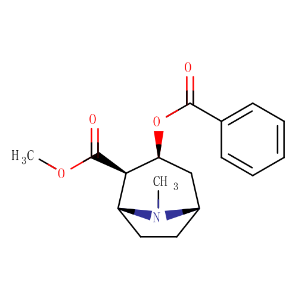 Cocaine | 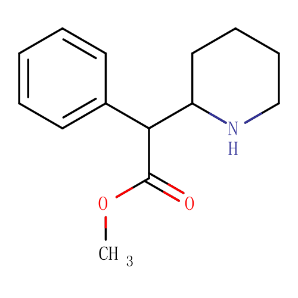 Methylphenidate | 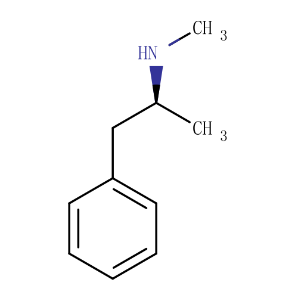 Methamphetamine | 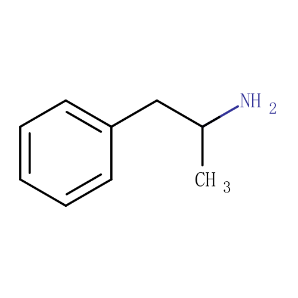 Amphetamine |
| --- | --- | --- | --- |
| 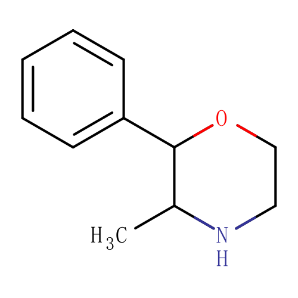 Phenmetrazine | 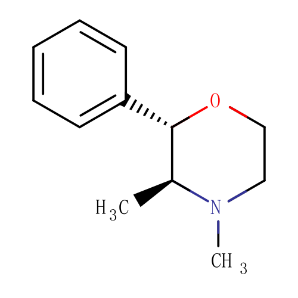 Phendimetrazine | 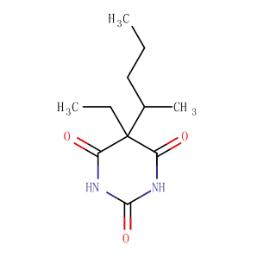 Pentobarbital | 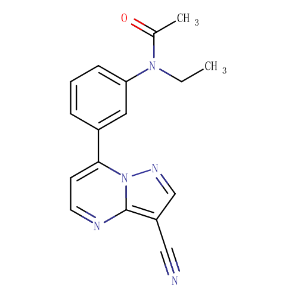 Zaleplon |
| 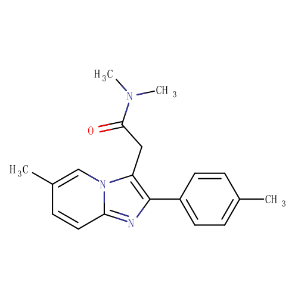 Zolpidem | 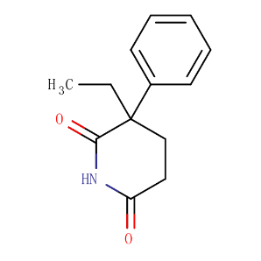 Glutethimide | 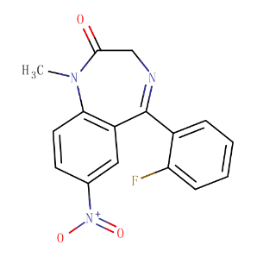 Flunitrazepam | 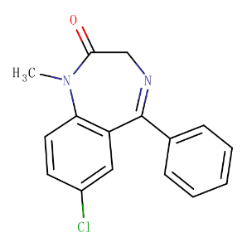 Diazepam |
| 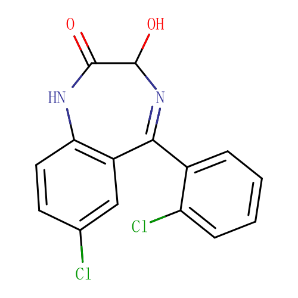 Lorazepam | 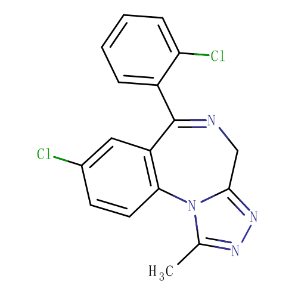 Triazolam | 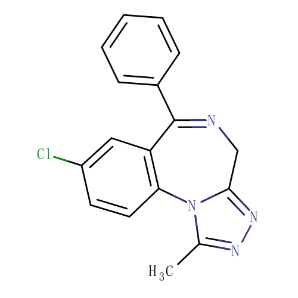 Alprazolam | 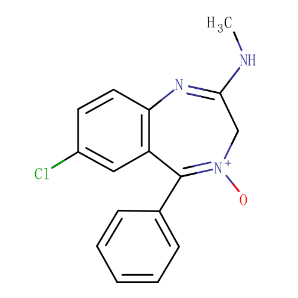 Chlordiazepoxide |
| 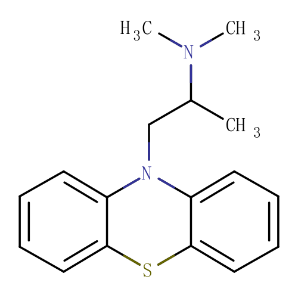 Promethazine | 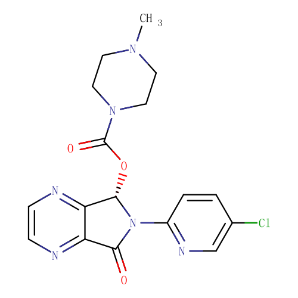 Eszopiclone | 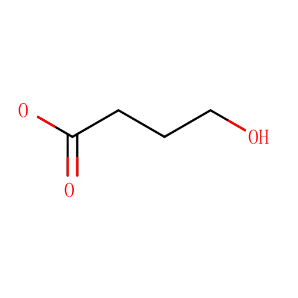 Gamma Hydroxybutyric Acid (GHB) | 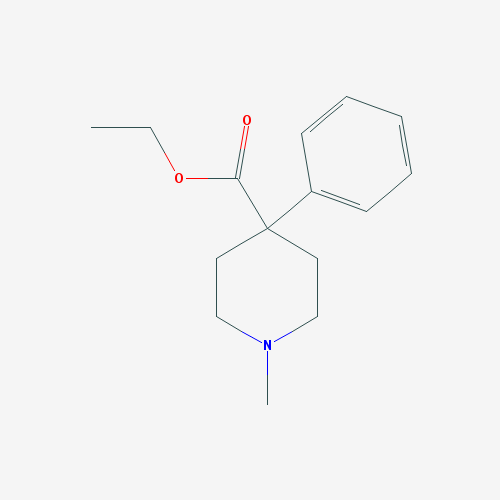  Meperidine |
| 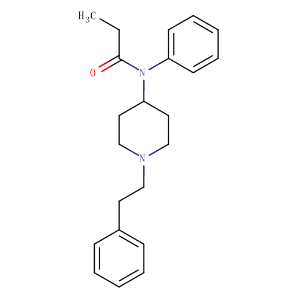 Fentanyl | 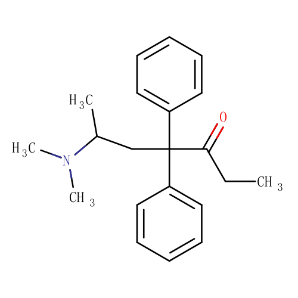 Methadone | 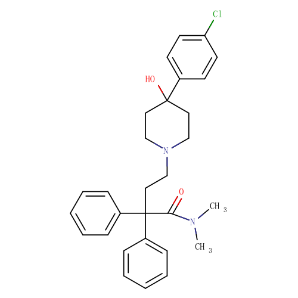 Loperamide | 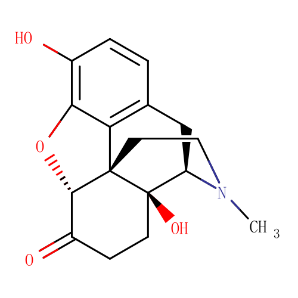 Oxymorphone |
| 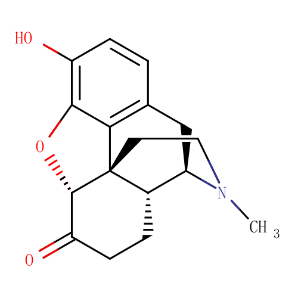 Hydromorphone | 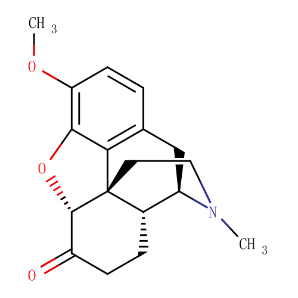 Hydrocodone | 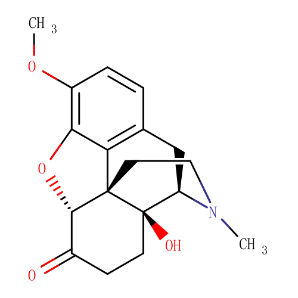 Oxycodone | 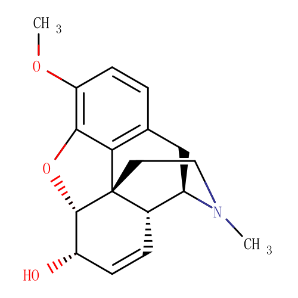 Codeine |
| 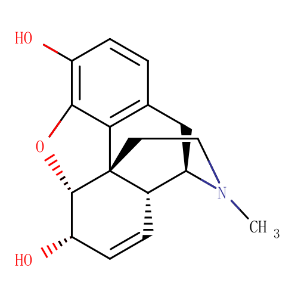 Morphine | 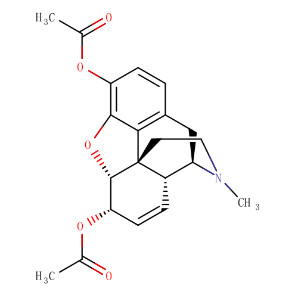 Heroin | 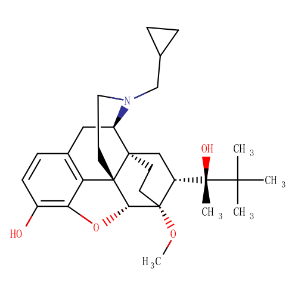 Buprenorphine | 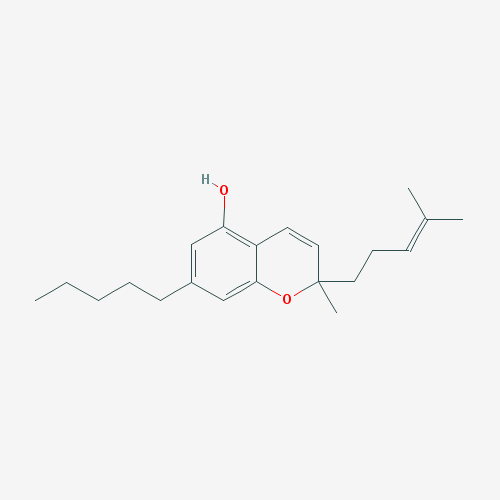 Cannabichromene |
| 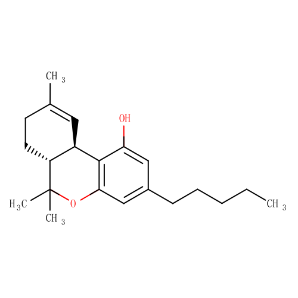 Dronabinol | 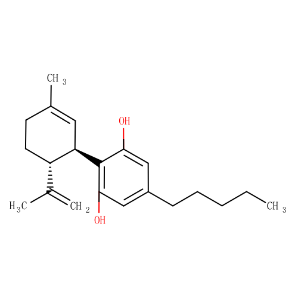 Cannabidiol | 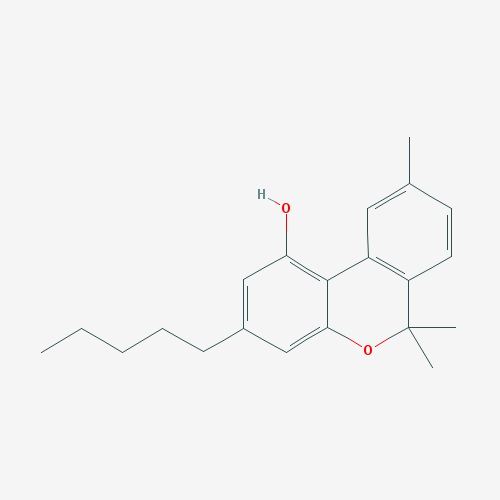 Cannabinol | 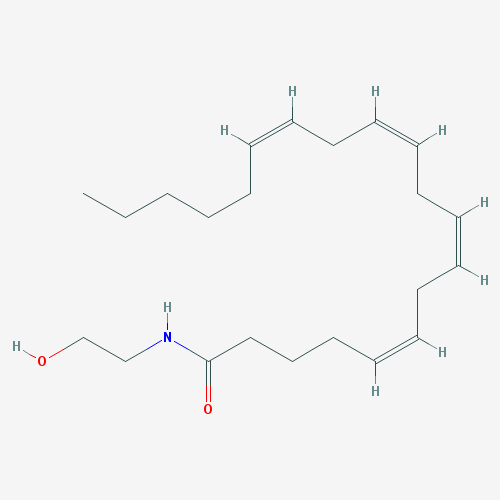 Anandamide |
| 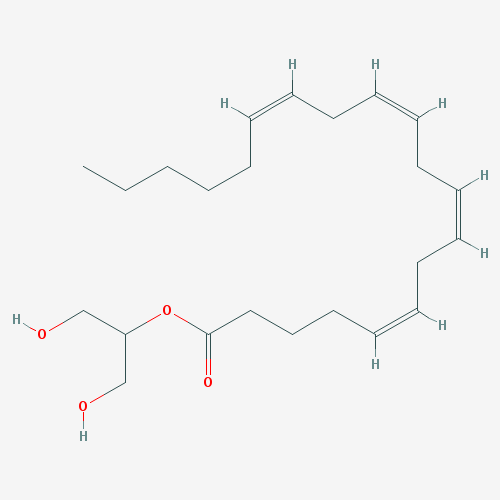 2-AG | 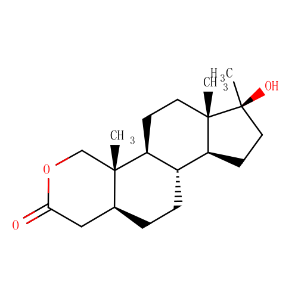 Oxandrolone | 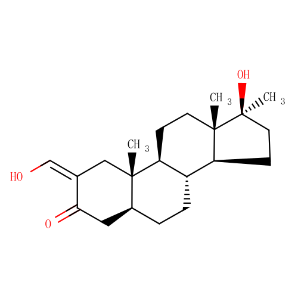 Oxymetholone | 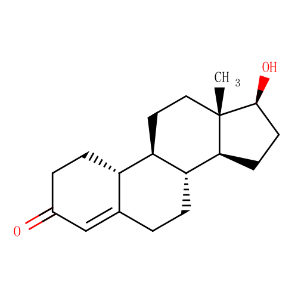 Nandrolone |
| 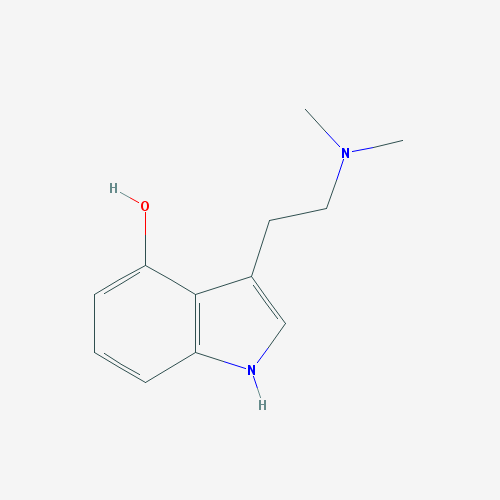 Psilocin | 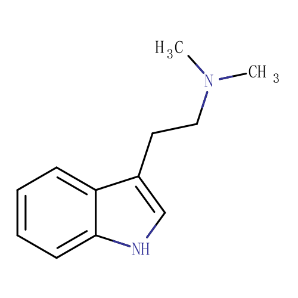 Dimethyltryptamine | 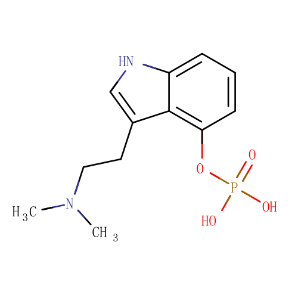 Psilocybin | 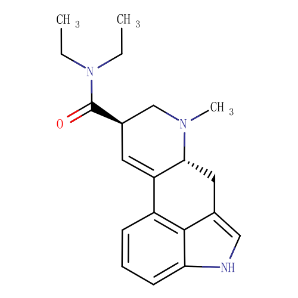 Lysergic Acid Diethylamide (LSD) |
| 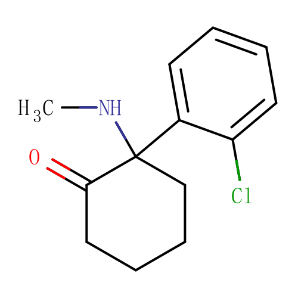 Ketamine | 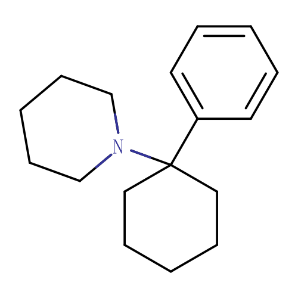 Phencyclidine | 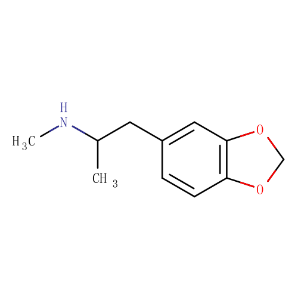 Midomafetamine | 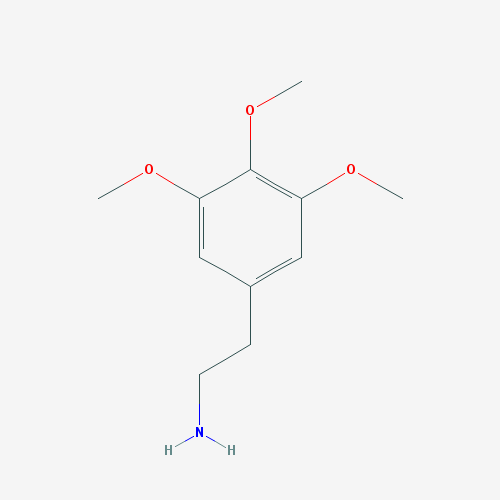 Mescaline |
| 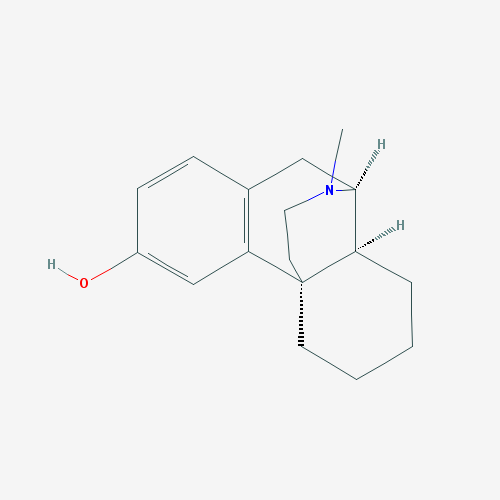 Dextrorphan | 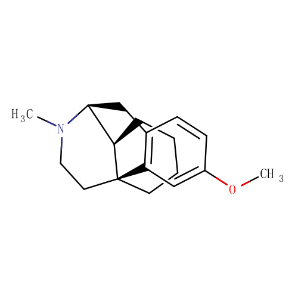 Dextromethorphan |  |  |

**Supplementary Figure 1. 2D structures of the 50 addictive drugs listed in Supplementary Table 1.** The names of drugs/chemicals are colored *green*, *blue*, red, *cyan*, *light brown*, *black* and *magenta* for the 6 CNS stimulants, 13 CNS depressants, 12 opioids, 7 cannabinoids, 4 anabolic steroids and 10 hallucinogens, respectively.

**Supplementary Figure 2. Prediction of new targets for known drugs of abuse. (A)** Drug-target interactions are shown for three drugs of abuse, cocaine, cannabichromene and nandrolone. The colors of the drug nodes are consistent with the label colors in **Figure 2C**; the diamond nodes represent targets, the color of the target nodes is consistent with the label colors in **Figure 2F**; diamonds nodes with *red* borders represent predicted targets, diamond nodes without borders are the known targets; *blue* edges are known interactions and *red* edges are predicted interactions. Note that the norepinephrine transporter (NET/SLC6A2) and dopamine transporter (DAT/SLC6A3) are shared between cocaine and cannabichromene. Corticotropin-releasing factor receptor 1 (CRHR1) was predicted to be a new target shared between cannabichromene and nandrolone. See the full names of the known and predicted targets in the respective **Supplementary Tables 2** and **3**. **(B)** Drug-target interactions are shown for opioid receptors. Green diamonds are opioid receptors (OPRs): OPRM1, OPRD1 and OPRK1; 12 opioids interact with three OPRs either by existing evidence or prediction; hallucinogens ketamine and dextromethorphan also interact with three OPRs; a novel interaction between OPRM1 and the CNS stimulant methylphenidate was predicted.


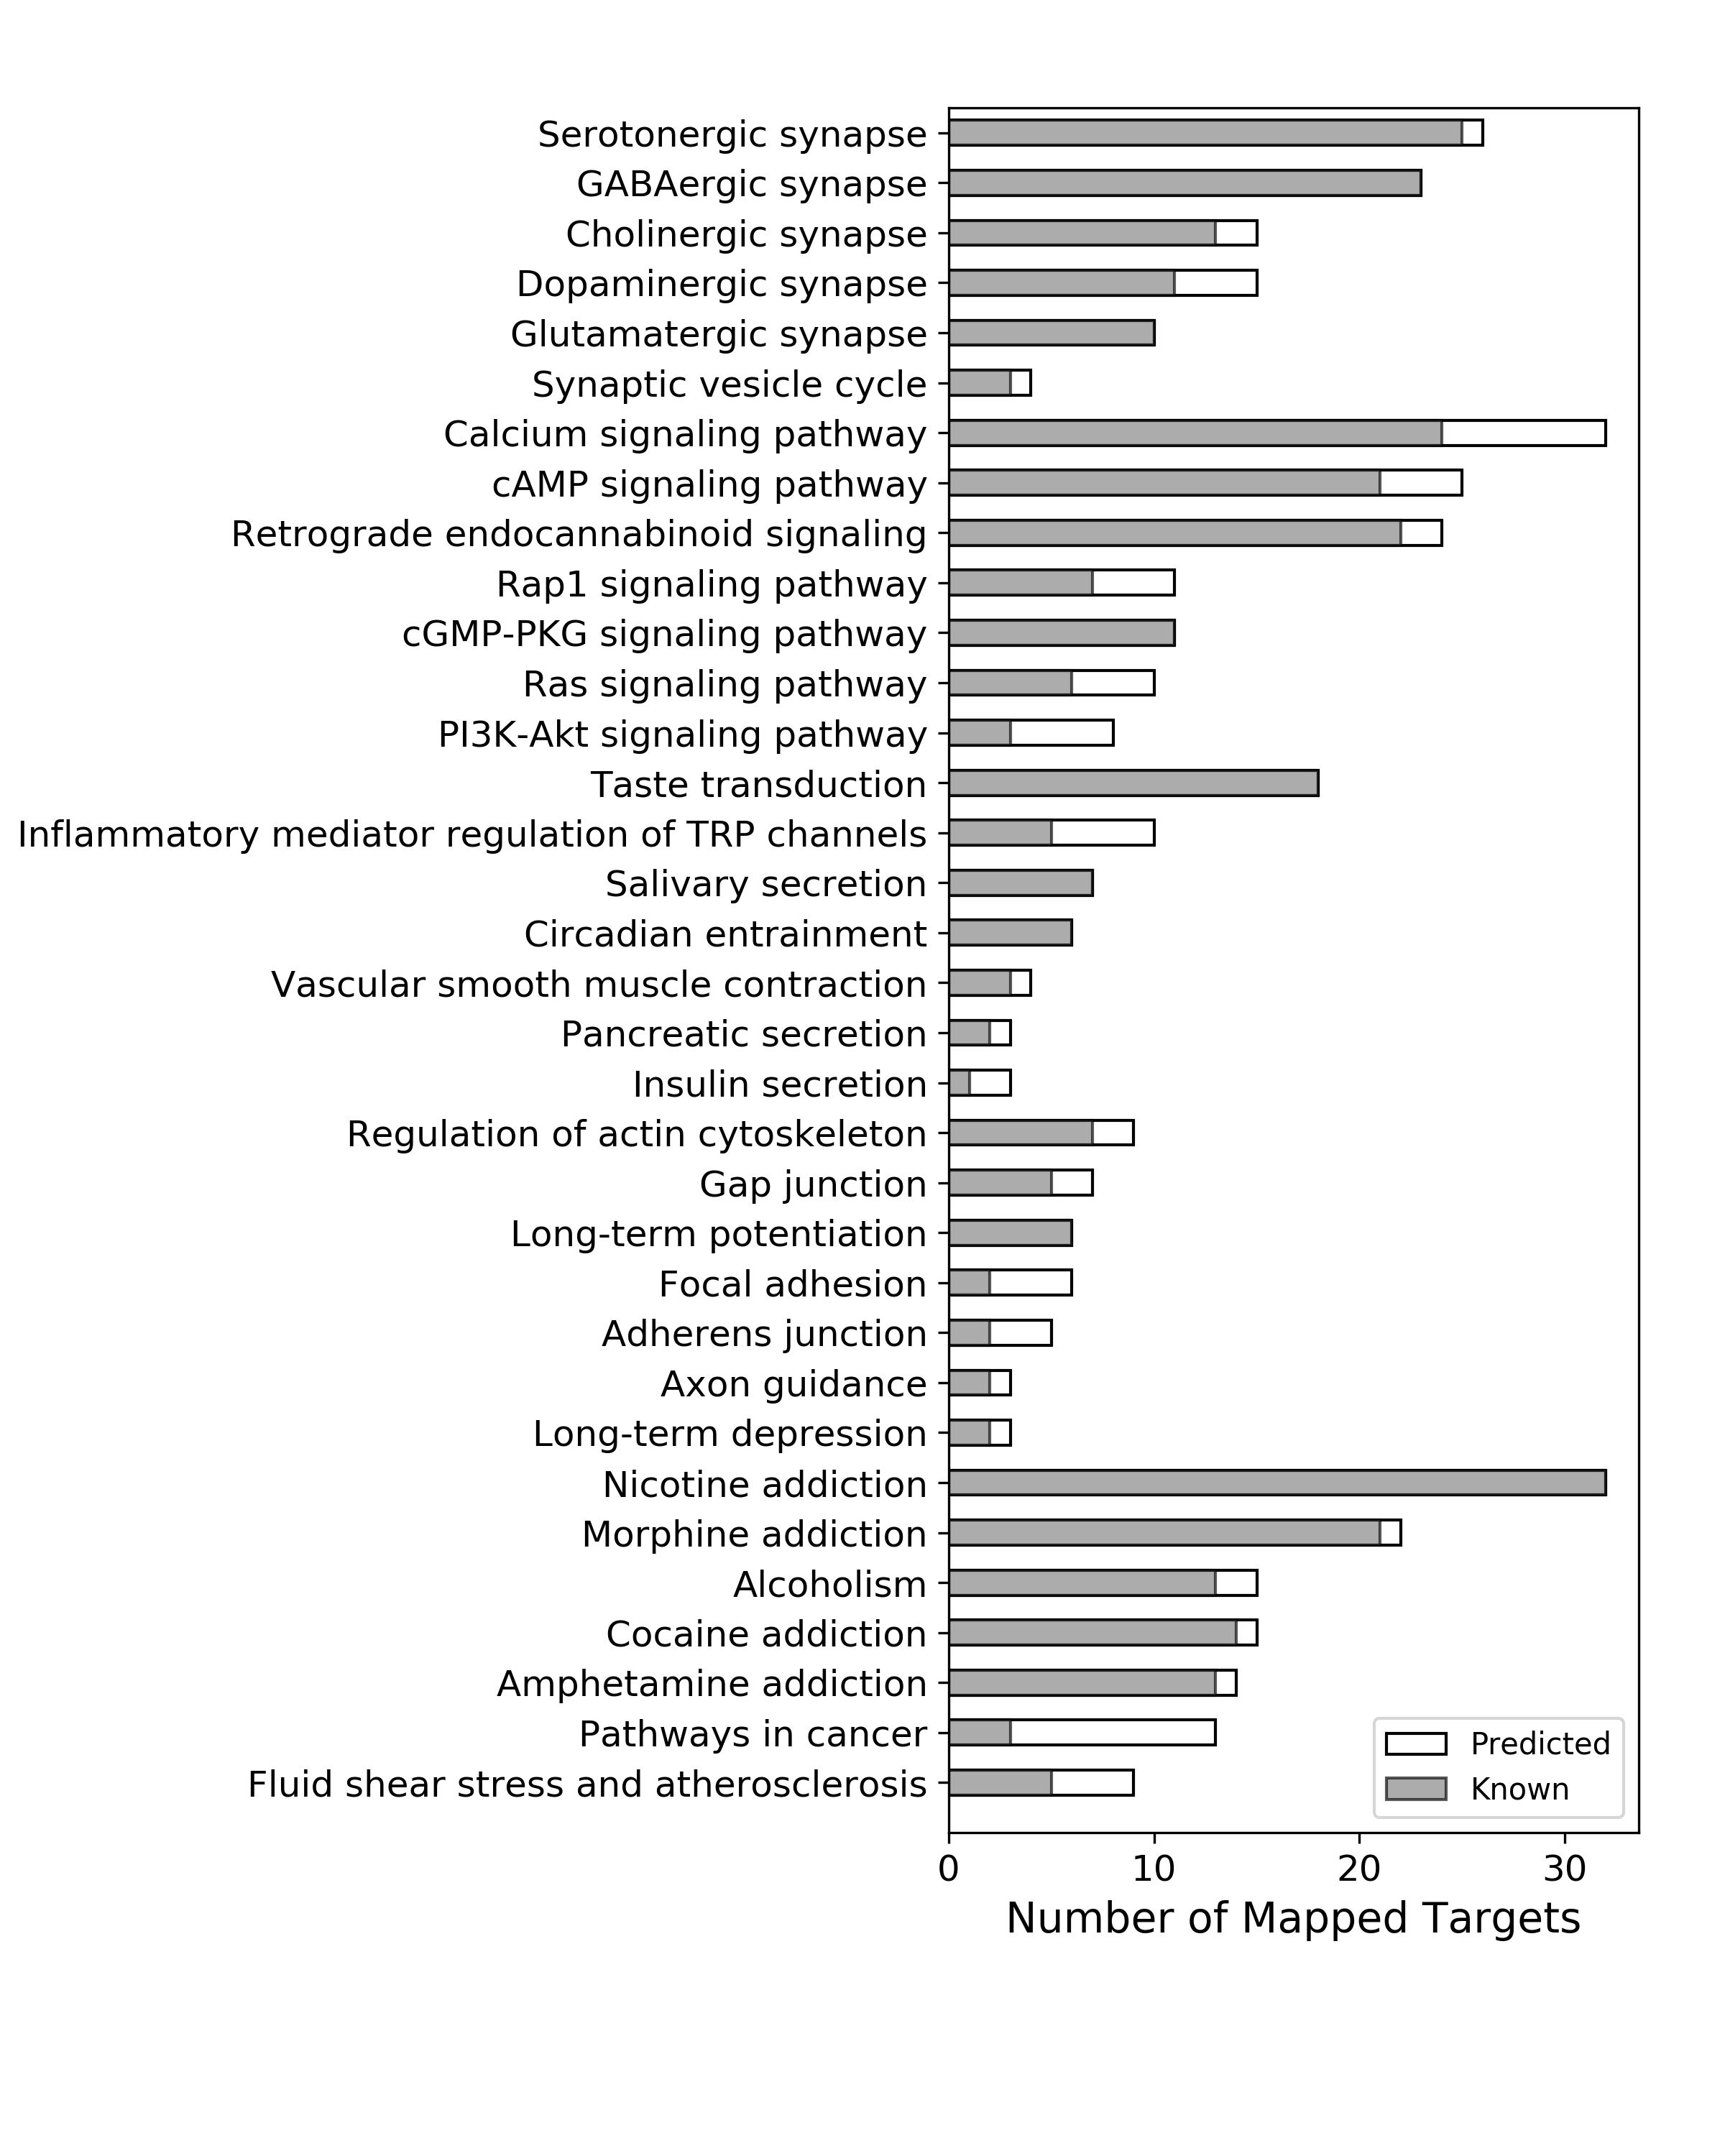


**Supplementary Figure 3. Pathways distinguished by high numbers of targets associated with drugs of abuse, organized in five categories, as listed in Figure 4.** The pathways listed in **Supplementary Table 4** are ordered by the *p*-value calculated by merged targets. The bars here represent the number of known (*gray*) and predicted (*white*) proteins targeted by drugs of abuse in each pathway. Up to seven pathways have been included in each case.

**Supplementary Figure 4. Pathway and target enrichments in five functional categories and the overlap of targets in different categories. (A)** Numbers of drug addiction pathways (*red*) and targets (*gray*) in the five pathway categories (NT: neurotransmission related pathways; SG: signal transduction pathways; DS: disease pathways; ANS: ANS-innervation related pathways and NP: neuroplasticity related pathways) identified from known (*left*) targets and predicted targets (*right*) exclude those pathways and targets involved in known drug-target interactions, respectively. (**B**) Numbers of overlapping known (*left*) and predicted (*right*) targets between NT, DS and SG pathway categories. (**C**) Overlap results as in (**B**), between NT, SG and NP pathway categories. (**D**) Overlap results as in (**B**), between NT, ANS and NP pathway categories. See detailed information on the identities of pathways and targets corresponding to the five functional categories in the **Supplementary Table 4**.


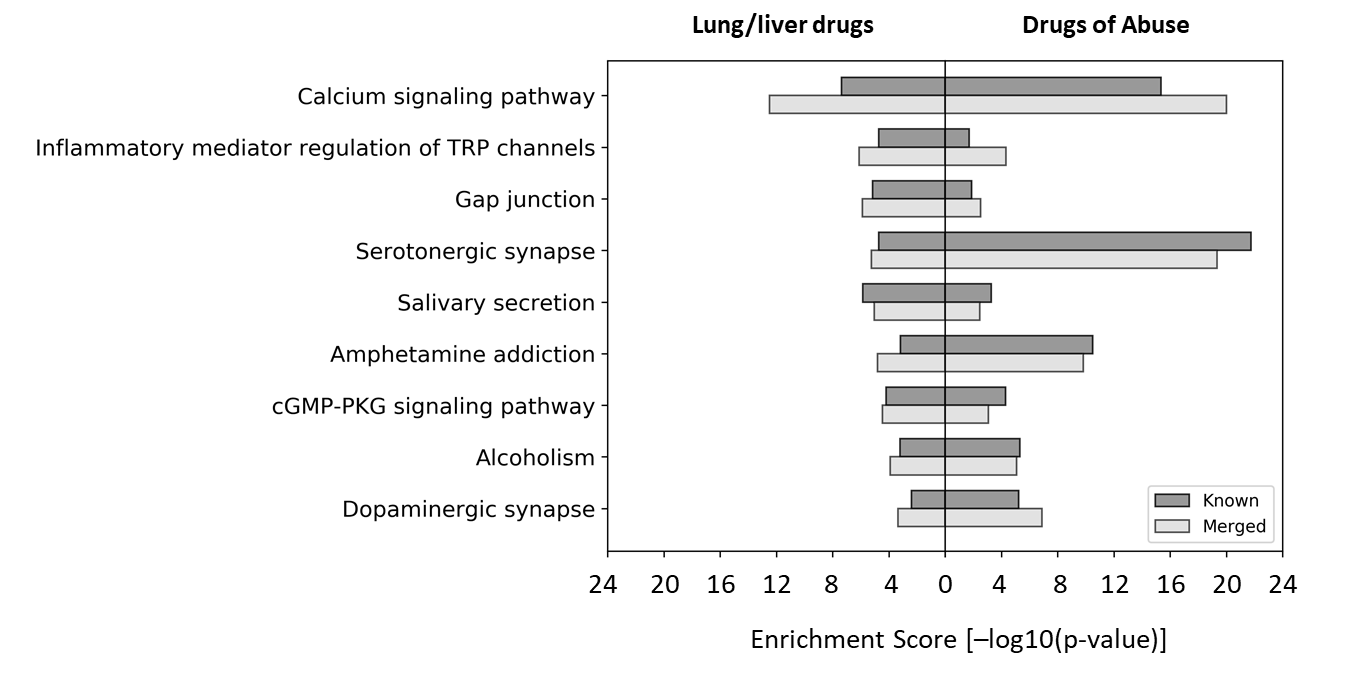


**Supplementary Figure 5**. **The** **enriched overlapping pathways for lung/liver drugs and drugs of abuse.** Enrichment *p*-values based on known (*gray*) or merged (*light gray*) targets (including both known and predicted targets) are calculated separately for each pathway, the pathways are ranked by the *p*-value calculated by merged targets of lung/liver drugs listed in **Supplementary Table 7**. There are 10 overlapping pathways with enrichment score (-log10(p-value)) over 2, between the pathways enriched by the examined sets of lung/liver drugs and drugs of abuse. Note that the neuroactive ligand-receptor interaction pathway, which has the highest enrichment score (known: 16.8, merged: 6.5 for lung/liver drugs; known: 104.6, merged: 93.05 for drugs of abuse) is not shown for visualization purpose.

## Supplementary Tables

**Supplementary Table 1. 50 addictive drugs and their corresponding groups and identifiers**

| **Index** | **Drug group and name** | | **DrugBank ID** | **Pubchem ID** | **# of targets** | **Reference** |
| --- | --- | --- | --- | --- | --- | --- |
| **1** | **CNS Stimulants** | Cocaine | DB00907 | 446220 | 45 | (Gawin and Ellinwood, 1988) |
| 2 | Methylphenidate | DB00422 | 4158 | 3 | (Klein-Schwartz, 2002) |
| 3 | Methamphetamine | DB01577 | 10836 | 11 | (Winslow et al., 2007) |
| 4 | Amphetamine | DB00182 | 3007 | 17 | (Kramer et al., 1967) |
| 5 | Phenmetrazine | DB00830 | 4762 | 2 | (Mellar and Hollister, 1982) |
| 6 | Phendimetrazine | DB01579 | 30487 | 3 | (Bolin et al., 2016) |
| 7 | **CNS Depressants** | Pentobarbital | DB00312 | 4737 | 27 | (Griffiths et al., 1979) |
| 8 | Zaleplon | DB00962 | 5719 | 2 | (Dooley and Plosker, 2000) |
| 9 | Zolpidem | DB00425 | 5732 | 13 | (Madrak and Rosenberg, 2001) |
| 10 | Glutethimide | DB01437 | 3487 | 16 | (Jones and Mayberry, 1986) |
| 11 | Flunitrazepam | DB01544 | 3380 | 16 | (Druid et al., 2001) |
| 12 | Diazepam | DB00829 | 3016 | 24 | (Woody et al., 1975) |
| 13 | Lorazepam | DB00186 | 3958 | 17 | (Troisi 2nd et al., 1993) |
| 14 | Triazolam | DB00897 | 5556 | 20 | (Fleming, 1983) |
| 15 | Alprazolam | DB00404 | 2118 | 17 | (Rush et al., 1993) |
| 16 | Chlordiazepoxide | DB00475 | 2712 | 16 | (Hollister et al., 1961) |
| 17 | Promethazine | DB01069 | 4927 | 19 | (Tsay et al., 2015) |
| 18 | Eszopiclone | DB00402 | 969472 | 17 | (Hajak et al., 2003) |
| 19 | Gamma Hydroxybutyric Acid (GHB) | DB01440 | 11266 | 2 | (Galloway et al., 2000) |
| 20 | **Opioids** | Meperidine | NA | 4058 | 2 | (Joranson et al., 2000) |
| 21 | Fentanyl | DB00813 | 3345 | 3 | (Gold et al., 2006) |
| 22 | Methadone | DB00333 | 4095 | 11 | (Cicero and Inciardi, 2005) |
| 23 | Loperamide | DB00836 | 3955 | 5 | (Lasoff et al., 2017) |
| 24 | Oxymorphone | DB01192 | 5284604 | 3 | (Babalonis et al., 2016) |
| 25 | Hydromorphone | DB00327 | 5284570 | 3 | (Walsh et al., 2008) |
| 26 | Hydrocodone | DB00956 | 5284569 | 2 | (Babalonis et al., 2016) |
| 27 | Oxycodone | DB00497 | 5284603 | 5 | (Harris et al., 2014) |
| 28 | Codeine | DB00318 | 5284371 | 3 | (Kathiramalainathan et al., 2000) |
| 29 | Morphine | DB00295 | 5288826 | 4 | (Preston et al., 1991) |
| 30 | Heroin | DB01452 | 5462328 | 3 | (Büttner et al., 2000) |
| 31 | Buprenorphine | DB00921 | 644073 | 4 | (Oconnor et al., 1988) |
| 32 | **Cannabinoids** | Cannabichromene | NA | 30219 | 1 | (Poklis et al., 2010) |
| 33 | Dronabinol | DB00470 | 16078 | 3 | (Calhoun et al., 1998) |
| 34 | Cannabidiol | DB09061 | 644019 | 2 | (Robson, 2011) |
| 35 | Cannabinol | NA | 2543 | 2 | (Yamamoto et al., 2003) |
| 36 | Anandamide | NA | 5281969 | 2 | (Solinas et al., 2007) |
| 37 | 2-AG | NA | 5282280 | 2 | (Solinas et al., 2007) |
| 38 | **Steroids** | Oxandrolone | DB00621 | 5878 | 1 | (Bahrke and Yesalis, 2004) |
| 39 | Oxymetholone | DB06412 | 5281034 | 2 | (Bahrke and Yesalis, 2004) |
| 40 | Nandrolone | DB13169 | 9904 | 2 | (Kouvelas et al., 2008) |
| 41 | **Hallucinogens** | Psilocin | NA | 4980 | 11 | (Ludwig and Levine, 1965) |
| 42 | Dimethyltryptamine | DB01488 | 8441 | 3 | (Winstock et al., 2014) |
| 43 | Psilocybin | DB11664 | 10624 | 5 | (Passie et al., 2002) |
| 44 | Lysergic Acid Diethylamide (LSD) | DB04829 | 5761 | 12 | (Simpson et al., 1997) |
| 45 | Ketamine | DB01221 | 3821 | 20 | (Dotson et al., 1995) |
| 46 | Phencyclidine | DB03575 | 6468 | 10 | (Slavney et al., 1977) |
| 47 | Midomafetamine | DB01454 | 1615 | 8 | (Seger, 2010) |
| 48 | Mescaline | NA | 4076 | 2 | (Neiman et al., 2000) |
| 49 | Dextrorphan | NA | 5360697 | 1 | (Schwartz, 2005) |
| 50 | Dextromethorphan | DB00514 | 5360696 | 21 | (Boyer, 2004) |

‘# of targets’ counts the number of targets of drugs recorded in both DrugBank v5 (Wishart et al., 2018) and STITCH v5 (Szklarczyk et al., 2016).

**Supplementary Tables 2-4** and **6** are presented in Excel files.

| **Supplementary Table 5. Enrichment of the 190 targets of addictive drugs in the brain** | | | | | |
| --- | --- | --- | --- | --- | --- |
| **Category(a)** | **Count** | | **Ref(b)** | **ER(c)** | **Targets(d)** |
| Elevated in brain | 49 | 1460 | | **3.4%** | **HTR5A; GABRB1; GRIA2; GABRG2; GABRG1; CHRNB2; GRIN2B; HTR2A; HTR2C; SLC6A17; GABRA5; GABRA4; GRIN1; GABRD; GABRA1; GABRB2; GABRA3; GABRA2; HRH3; P2RY12**; SLC6A1; SLC6A7; OPRL1; CNR1; CACNA1A; GRIN3A; SLC6A11; SLC6A15; CHRM5; CHRM4; CHRM3; CHRM1; CHRNA4; OPRK1; GABRB3; ADRA1B; GRIK2; GABRQ; GRIN2C; GRIN2A; HTR3B; OPRD1; GRIN2D; HTR1A; CCKBR; GLP1R; DRD5; CRHR1; DRD1 |
| Moderately expressed in brain | 82 | 13058 | | 0.6% | SLC52A2; RAC2; PGRMC1; RAC1; CHRNB1; GABRP; CYBA; BRD4; PRCP; TSPO; SIGMAR1; ERBB2; NR3C1; HDAC6; S1PR1; EPHX2; MAPK14; PPARD; HMGCR; CTSS; CDK2; NR1H2; DPP7; NCF2; NCF1; SLC6A6; NCF4; GABRG3; SLC6A9; SLC6A8; ADRB2; BCHE; ADRB1; TMIGD3; ADRA2A; ADRA2C; HRH1; SLC6A13; SLC6A12; SLC6A16; CHRM2; CYBB; HTR7; AR; CARTPT; CHRNA2; POMC; ACHE; TACR1; ADRA1A; SLC6A20; ADRA1D; KCNH2; ALB; MAOB; MAOA; CHRNA7; HTR1B; GABRE; HTR1E; HTR1F; CHRNA5; PTGS2; IGF1R; PTGDR2; CRHR2; CALCRL; DHFR; PIK3CA; EGFR; THRB; IKBKB; PPARG; DHFR2; PTAFR; TYMS; SRD5A1; TRPV2; TRPV1; F10; P2RX7; CHEK1 |
| Not detected in brain | 59 | 5095 | | 1.2% | CHRNE; SLC6A2; SLC6A5; SLC6A4; GABRR1; CHRNA10; AOX1; GPR55; TRPA1; GABRA6; CNR2; CHRNB3; CHRNB4; ADRA2B; XDH; SLC6A19; SLC6A18; PGR; HTR2B; NPPB; SLC6A14; SCN11A; HTR3E; GRIN3B; OPRM1; CHRNG; CHRNA1; CHRNA3; CHRNA9; TAAR1; ORM1; ORM2; DRD2; DRD3; ADRB3; HTR3C; CHRND; HTR3A; HTR1D; SLC18A2; SLC18A1; SCN5A; VDR; ESR2; CCKAR; GCGR; TRPV4; CALCA; SLC6A3; GABRR2; GABRR3; HRH4; SCN10A; HTR6; HTR3D; CHRNA6; SLC18A3; GLRA1; DRD4 |
| Total | 190 | 19613 | |  |  |
| *(a)Categories of targets (genes) are defined based on the mRNA expression levels of genes with the unit of Transcript Per Million (TPM) (Uhlén et al., 2015). Elevated in brain: > 5-fold higher than other tissues (targets in bold are the most enriched in the brain); Moderately expressed in brain: at least 1 TPM in brain and other tissues; Not detected in brain: less than 1 TPM in brain.  (b)Number of genes in human proteome belong to each category. (c)Enrichment ratio (ER) is the ratio of between numbers in Count and Ref columns. The ER in category of “Elevated in brain” is ~5-fold higher than that in “Moderately expressed in brain”.  (d)Predicted targets are colored in red.* | | | | | |

**Supplementary Table 7. 15 autophagy-modulating drugs(a) for liver and lung diseases.**

| **No.** | **Drug name** | **DrugBank ID** | **Pubchem ID** | **Disease** | **Reference** |
| --- | --- | --- | --- | --- | --- |
| **1** | Carbamazepine | DB00564 | 2554 | alpha1-antitrypsin deficiency; hepatic fibrosis; lung Proteinopathy | (Hidvegi et al., 2010; Hidvegi et al., 2015) |
| 2 | Fluphenazine | DB00623 | 3372 | alpha1-antitrypsin deficiency; lung Proteinopathy | (Li et al., 2014; Hidvegi et al., 2015) |
| 3 | Cantharidin | NA | 5944 | alpha1-antitrypsin deficiency | (Krichevsky et al., 2010) |
| 4 | Pimozide | DB01100 | 16362 | alpha1-antitrypsin deficiency | (Park et al., 2010) |
| 5 | Tamoxifen | DB00675 | 2733525 | alpha1-antitrypsin deficiency | (De Mol et al., 2010) |
| 6 | Phenylbutyric Acid | NA | 4775 | alpha1-antitrypsin deficiency | (Burrows et al., 2000) |
| 7 | Vorinostat | NA | 5311 | alpha1-antitrypsin deficiency | (Bouchecareilh et al., 2012) |
| 8 | Glycerol | DB09462 | 753 | alpha1-antitrypsin deficiency | (Burrows et al., 2000) |
| 9 | Fluspirilene | DB04842 | 3396 | alpha1-antitrypsin deficiency | (O'reilly et al., 2014) |
| 10 | Ezetimibe | NA | 150311 | alpha1-antitrypsin deficiency | (Yamamura et al., 2014) |
| 11 | Gemfibrozil | DB01241 | 3463 | COPD-emphysema | (Bodas et al., 2017a) |
| 12 | Fisetin | NA | 5281614 | COPD-emphysema | (Bodas et al., 2017a) |
| 13 | Cysteamine | NA | 6058 | COPD-emphysema | (Bodas et al., 2016; Shivalingappa et al., 2016) |
| 14 | S-Nitrosoglutathione | NA | 104858 | COPD-emphysema | (Bodas et al., 2017b) |
| 15 | Rapamycin | NA | 5284616 | lung fibrosis; cystic fibrosis | (Kouvelas et al., 2008; Abdulrahman et al., 2011; Patel et al., 2012) |

*(a)These drugs are known autophagy modulators and have been reported to have therapeutic effects for liver and lung diseases.*

# Supplementary References

Abdulrahman, B.A., Khweek, A.A., Akhter, A., Caution, K., Kotrange, S., Abdelaziz, D.H., et al. (2011). Autophagy stimulation by rapamycin suppresses lung inflammation and infection by Burkholderia cenocepacia in a model of cystic fibrosis. *Autophagy* 7(11)**,** 1359-1370. doi: 10.4161/auto.7.11.17660.

Babalonis, S., Lofwall, M.R., Nuzzo, P.A., and Walsh, S.L. (2016). Pharmacodynamic effects of oral oxymorphone: abuse liability, analgesic profile and direct physiologic effects in humans. *Addict. Biol.* 21(1)**,** 146-158. doi: 10.1111/adb.12173.

Bahrke, M.S., and Yesalis, C.E. (2004). Abuse of anabolic androgenic steroids and related substances in sport and exercise. *Curr. Opin. Pharm.* 4(6)**,** 614-620.

Bodas, M., Patel, N., Silverberg, D., Walworth, K., and Vij, N. (2017a). Master autophagy regulator transcription factor EB regulates cigarette smoke-induced autophagy impairment and chronic obstructive pulmonary disease–emphysema pathogenesis. *Antioxid. Redox Signal.* 27(3)**,** 150-167.

Bodas, M., Silverberg, D., Walworth, K., Brucia, K., and Vij, N. (2017b). Augmentation of S-nitrosoglutathione controls cigarette smoke-induced inflammatory–oxidative stress and chronic obstructive pulmonary disease-emphysema pathogenesis by restoring cystic fibrosis transmembrane conductance regulator function. *Antioxid. Redox Signal.* 27(7)**,** 433-451.

Bodas, M., Van Westphal, C., Carpenter-Thompson, R., Mohanty, D.K., and Vij, N. (2016). Nicotine exposure induces bronchial epithelial cell apoptosis and senescence via ROS mediated autophagy-impairment. *Free Radical Biol. Med.* 97**,** 441-453.

Bolin, B.L., Stoops, W.W., Sites, J.P., and Rush, C.R. (2016). Abuse Potential of Oral Phendimetrazine in Cocaine-dependent Individuals: Implications for Agonist-like Replacement Therapy. *J. Addict. Med.* 10(3)**,** 156-165. doi: 10.1097/ADM.0000000000000206.

Bouchecareilh, M., Hutt, D.M., Szajner, P., Flotte, T.R., and Balch, W.E. (2012). Histone deacetylase inhibitor (HDACi) suberoylanilide hydroxamic acid (SAHA)-mediated correction of α1-antitrypsin deficiency. *J. Biol. Chem.* 287(45)**,** 38265-38278.

Boyer, E.W. (2004). Dextromethorphan abuse. *Pediatr. Emerg. Care* 20(12)**,** 858-863.

Burrows, J.A., Willis, L.K., and Perlmutter, D.H. (2000). Chemical chaperones mediate increased secretion of mutant α1-antitrypsin (α1-AT) Z: a potential pharmacological strategy for prevention of liver injury and emphysema in α1-AT deficiency. *PNAS* 97(4)**,** 1796-1801.

Büttner, A., Mall, G., Penning, R., and Weis, S. (2000). The neuropathology of heroin abuse. *Forensic Sci. Int.* 113(1-3)**,** 435-442.

Calhoun, S.R., Galloway, G.P., and Smith, D.E. (1998). Abuse potential of dronabinol (Marinol). *J. Psychoactive Drugs* 30(2)**,** 187-196. doi: 10.1080/02791072.1998.10399689.

Cicero, T.J., and Inciardi, J.A. (2005). Diversion and abuse of methadone prescribed for pain management. *JAMA* 293(3)**,** 293-298. doi: 10.1001/jama.293.3.297.

De Mol, P., Krabbe, H.G., De Vries, S.T., Fokkert, M.J., Dikkeschei, B.D., Rienks, R., et al. (2010). Accuracy of handheld blood glucose meters at high altitude. *PLoS One* 5(11)**,** e15485.

Dooley, M., and Plosker, G.L. (2000). Zaleplon. *Drugs* 60(2)**,** 413-445. doi: 10.2165/00003495-200060020-00014.

Dotson, J.W., Ackerman, D.L., and West, L.J. (1995). Ketamine Abuse. *J. Drug Iss.* 25(4)**,** 751-757. doi: Doi 10.1177/002204269502500407.

Druid, H., Holmgren, P., and Ahlner, J. (2001). Flunitrazepam: an evaluation of use, abuse and toxicity. *Forensic Sci. Int.* 122(2-3)**,** 136-141.

Fleming, J.A. (1983). Triazolam abuse. *Can. Med. Assoc. J.* 129(4)**,** 324-325.

Galloway, G., Frederick-Osborne, S., Seymour, R., Contini, S.E., and Smith, D.E. (2000). Abuse and therapeutic potential of gamma-hydroxybutyric acid. *Alcohol* 20(3)**,** 263-269.

Gawin, F.H., and Ellinwood, E.H., Jr. (1988). Cocaine and other stimulants. Actions, abuse, and treatment. *N. Engl. J. Med.* 318(18)**,** 1173-1182. doi: 10.1056/NEJM198805053181806.

Gold, M.S., Melker, R.J., Dennis, D.M., Morey, T.E., Bajpai, L.K., Pomm, R., et al. (2006). Fentanyl abuse and dependence: further evidence for second hand exposure hypothesis. *J. Addict. Dis.* 25(1)**,** 15-21. doi: 10.1300/J069v25n01_04.

Griffiths, R.R., Bigelow, G., and Liebson, I. (1979). Human drug self-administration: double-blind comparison of pentobarbital, diazepam, chlorpromazine and placebo. *J. Pharmacol. Exp. Ther.* 210(2)**,** 301-310.

Hajak, G., Müller, W.E., Wittchen, H.U., Pittrow, D., and Kirch, W. (2003). Abuse and dependence potential for the non-benzodiazepine hypnotics zolpidem and zopiclone: a review of case reports and epidemiological data. *Addiction* 98(10)**,** 1371-1378. doi: doi:10.1046/j.1360-0443.2003.00491.x.

Harris, S.C., Perrino, P.J., Smith, I., Shram, M.J., Colucci, S.V., Bartlett, C., et al. (2014). Abuse potential, pharmacokinetics, pharmacodynamics, and safety of intranasally administered crushed oxycodone HCl abuse-deterrent controlled-release tablets in recreational opioid users. *J. Clin. Pharmacol.* 54(4)**,** 468-477. doi: 10.1002/jcph.235.

Hidvegi, T., Ewing, M., Hale, P., Dippold, C., Beckett, C., Kemp, C., et al. (2010). An autophagy-enhancing drug promotes degradation of mutant α1-antitrypsin Z and reduces hepatic fibrosis. *Science* 329(5988)**,** 229-232.

Hidvegi, T., Stolz, D.B., Alcorn, J.F., Yousem, S.A., Wang, J., Leme, A.S., et al. (2015). Enhancing autophagy with drugs or lung-directed gene therapy reverses the pathological effects of respiratory epithelial cell proteinopathy. *J. Biol. Chem.* 290(50)**,** 29742-29757. doi: 10.1074/jbc.M115.691253.

Hollister, L.E., Motzenbecker, F.P., and Degan, R.O. (1961). Withdrawal reactions from chlordiazepoxide (“Librium”). *Psychopharmacologia* 2(1)**,** 63-68. doi: 10.1007/bf00429621.

Jones, A.H., and Mayberry, J.F. (1986). Chronic glutethimide abuse. *Br. J. Clin. Pract.* 40(5)**,** 213.

Joranson, D.E., Ryan, K.M., Gilson, A.M., and Dahl, J.L. (2000). Trends in medical use and abuse of opioid analgesics. *JAMA* 283(13)**,** 1710-1714. doi: 10.1001/jama.283.13.1710.

Kathiramalainathan, K., Kaplan, H.L., Romach, M.K., Busto, U.E., Li, N.Y., Sawe, J., et al. (2000). Inhibition of cytochrome P450 2D6 modifies codeine abuse liability. *J. Clin. Psychopharmacol.* 20(4)**,** 435-444.

Klein-Schwartz, W. (2002). Abuse and toxicity of methylphenidate. *Curr. Opin. Pediatr.* 14(2)**,** 219-223.

Kouvelas, D., Pourzitaki, C., Papazisis, G., Dagklis, T., Dimou, K., and Kraus, M.M. (2008). Nandrolone abuse decreases anxiety and impairs memory in rats via central androgenic receptors. *Int. J. Neuropsychopharmacol.* 11(7)**,** 925-934. doi: 10.1017/S1461145708008754.

Kramer, J.C., Fischman, V.S., and Littlefield, D.C. (1967). Amphetamine abuse: Pattern and effects of high doses taken intravenously. *JAMA* 201(5)**,** 305-309. doi: 10.1001/jama.1967.03130050039011.

Krichevsky, A., Meyers, B., Vainstein, A., Maliga, P., and Citovsky, V. (2010). Autoluminescent plants. *PLoS One* 5(11)**,** e15461.

Lasoff, D.R., Koh, C.H., Corbett, B., Minns, A.B., and Cantrell, F.L. (2017). Loperamide Trends in Abuse and Misuse Over 13 Years: 2002-2015. *Pharmacotherapy* 37(2)**,** 249-253. doi: 10.1002/phar.1885.

LESLIE N. MADRAK, and MARK ROSENBERG (2001). Zolpidem Abuse. *Am. J. Psychiatry* 158(8)**,** 1330-a-1331. doi: 10.1176/appi.ajp.158.8.1330-a.

Li, J., Pak, S.C., O’Reilly, L.P., Benson, J.A., Wang, Y., Hidvegi, T., et al. (2014). Fluphenazine reduces proteotoxicity in C. elegans and mammalian models of alpha-1-antitrypsin deficiency. *PLoS One* 9(1)**,** e87260.

Ludwig, A.M., and Levine, J. (1965). Patterns of hallucinogenic drug abuse. *JAMA* 191(2)**,** 92-96. doi: 10.1001/jama.1965.03080020020006.

Mellar, J., and Hollister, L.E. (1982). Phenmetrazine: an obsolete problem drug. *Clin. Pharmacol. Ther.* 32(6)**,** 671-675.

Neiman, J., Haapaniemi, H.M., and Hillbom, M. (2000). Neurological complications of drug abuse: pathophysiological mechanisms. *Eur. J. Neurol.* 7(6)**,** 595-606.

O'reilly, L.P., Long, O.S., Cobanoglu, M.C., Benson, J.A., Luke, C.J., Miedel, M.T., et al. (2014). A genome-wide RNAi screen identifies potential drug targets in a C. elegans model of α1-antitrypsin deficiency. *Hum. Mol. Genet.* 23(19)**,** 5123-5132.

Oconnor, J.J., Moloney, E., Travers, R., and Campbell, A. (1988). Buprenorphine Abuse among Opiate Addicts. *Br. J. Addict.* 83(9)**,** 1085-1087.

Park, J., Jeon, Y., In, D., Fishel, R., Ban, C., and Lee, J.-B. (2010). Single-molecule analysis reveals the kinetics and physiological relevance of MutL-ssDNA binding. *PLoS One* 5(11)**,** e15496.

Passie, T., Seifert, J., Schneider, U., and Emrich, H.M. (2002). The pharmacology of psilocybin. *Addict. Biol.* 7(4)**,** 357-364. doi: 10.1080/1355621021000005937.

Patel, A.S., Lin, L., Geyer, A., Haspel, J.A., An, C.H., Cao, J., et al. (2012). Autophagy in idiopathic pulmonary fibrosis. *PLoS One* 7(7)**,** e41394. doi: 10.1371/journal.pone.0041394.

Poklis, J.L., Thompson, C.C., Long, K.A., Lichtman, A.H., and Poklis, A. (2010). Disposition of cannabichromene, cannabidiol, and Delta(9)-tetrahydrocannabinol and its metabolites in mouse brain following marijuana inhalation determined by high-performance liquid chromatography-tandem mass spectrometry. *J. Anal. Toxicol.* 34(8)**,** 516-520.

Preston, K.L., Jasinski, D.R., and Testa, M. (1991). Abuse potential and pharmacological comparison of tramadol and morphine. *Drug Alcohol Depend.* 27(1)**,** 7-17.

Robson, P. (2011). Abuse potential and psychoactive effects of δ-9-tetrahydrocannabinol and cannabidiol oromucosal spray (Sativex), a new cannabinoid medicine. *Expert Opinion on Drug Safety* 10(5)**,** 675-685. doi: 10.1517/14740338.2011.575778.

Rush, C.R., Higgins, S.T., Bickel, W.K., and Hughes, J.R. (1993). Abuse liability of alprazolam relative to other commonly used benzodiazepines: a review. *Neurosci. Biobehav. Rev.* 17(3)**,** 277-285.

Schwartz, R.H. (2005). Adolescent Abuse of Dextromethorphan. *Clinical Pediatrics* 44(7)**,** 565-568. doi: 10.1177/000992280504400702.

Seger, D. (2010). Cocaine, metamfetamine, and MDMA abuse: the role and clinical importance of neuroadaptation. *Clinl Toxicol* 48(7)**,** 695-708. doi: 10.3109/15563650.2010.516263.

Shivalingappa, P.C., Hole, R., Van Westphal, C., and Vij, N. (2016). Airway exposure to e-cigarette vapors impairs autophagy and induces aggresome formation. *Antioxid. Redox Signal.* 24(4)**,** 186-204.

Simpson, D., Braithwaite, R.A., Jarvie, D.R., Stewart, M.J., Walker, S., Watson, I.W., et al. (1997). Screening for drugs of abuse (II): Cannabinoids, lysergic acid diethylamide, buprenorphine, methadone, barbiturates, benzodiazepines and other drugs. *Ann. Clin. Biochem.* 34 ( Pt 5)**,** 460-510. doi: 10.1177/000456329703400502.

Slavney, P.R., Rich, G.B., Pearlson, G.D., and McHugh, P.R. (1977). Phencyclidine abuse and symptomatic mania. *Biol. Psychiatry* 12(5)**,** 697-700.

Solinas, M., Yasar, S., and Goldberg, S.R. (2007). Endocannabinoid system involvement in brain reward processes related to drug abuse. *Pharmacol. Res.* 56(5)**,** 393-405.

Szklarczyk, D., Santos, A., von Mering, C., Jensen, L.J., Bork, P., and Kuhn, M. (2016). STITCH 5: augmenting protein-chemical interaction networks with tissue and affinity data. *Nucleic Acids Res.* 44(D1)**,** D380-384. doi: 10.1093/nar/gkv1277.

Troisi 2nd, J.R., Critchfield, T.S., and Griffiths, R.R. (1993). Buspirone and lorazepam abuse liability in humans: behavioral effects, subjective effects and choice. *Behav. Pharmacol.* 4(3)**,** 217-230.

Tsay, M.E., Procopio, G., Anderson, B.D., and Klein-Schwartz, W. (2015). Abuse and Intentional Misuse of Promethazine Reported to US Poison Centers: 2002 to 2012. *J. Addict. Med.* 9(3)**,** 233-237. doi: 10.1097/ADM.0000000000000124.

Uhlén, M., Fagerberg, L., Hallström, B.M., Lindskog, C., Oksvold, P., Mardinoglu, A., et al. (2015). Tissue-based map of the human proteome. *Science* 347(6220). doi: 10.1126/science.1260419.

Walsh, S.L., Nuzzo, P.A., Lofwall, M.R., and Holtman, J.R., Jr. (2008). The relative abuse liability of oral oxycodone, hydrocodone and hydromorphone assessed in prescription opioid abusers. *Drug Alcohol Depend.* 98(3)**,** 191-202. doi: 10.1016/j.drugalcdep.2008.05.007.

Winslow, B.T., Voorhees, K.I., and Pehl, K.A. (2007). Methamphetamine abuse. *American family physician* 76(8)**,** 1169-1174.

Winstock, A.R., Kaar, S., and Borschmann, R. (2014). Dimethyltryptamine (DMT): prevalence, user characteristics and abuse liability in a large global sample. *J Psychopharmacol* 28(1)**,** 49-54. doi: 10.1177/0269881113513852.

Wishart, D.S., Feunang, Y.D., Guo, A.C., Lo, E.J., Marcu, A., Grant, J.R., et al. (2018). DrugBank 5.0: a major update to the DrugBank database for 2018. *Nucleic Acids Res.* 46(D1)**,** D1074-D1082. doi: 10.1093/nar/gkx1037.

Woody, G.E., O'Brien, C.P., and Greenstein, R. (1975). Misuse and abuse of diazepam: an increasingly common medical problem. *Int. J. Addict.* 10(5)**,** 843-848.

Yamamoto, I., Watanabe, K., Matsunaga, T., Kimura, T., Funahashi, T., and Yoshimura, H. (2003). Pharmacology and toxicology of major constituents of marijuana - On the metabolic activation of cannabinoids and its mechanism. *J Toxicol-Toxin Rev* 22(4)**,** 577-589. doi: 10.1081/Txr-120026915.

Yamamura, T., Ohsaki, Y., Suzuki, M., Shinohara, Y., Tatematsu, T., Cheng, J., et al. (2014). Inhibition of Niemann-Pick-type C1-like1 by ezetimibe activates autophagy in human hepatocytes and reduces mutant alpha1-antitrypsin Z deposition. *Hepatology* 59(4)**,** 1591-1599. doi: 10.1002/hep.26930.
