# Supplementary material for: Quantitative Systems Pharmacological Analysis of Drugs of Abuse Reveals the Pleiotropy of Their Targets and the Effector Role of mTORC1
Source: Front Pharmacol. 2019 Mar 8;10:191. doi: 10.3389/fphar.2019.00191 (PMC6418047; doi:10.3389/fphar.2019.00191)
Supplement: Supplementary file 2 [file Table_2.XLSX]

## Sheet: Known_targets
Supplementary Table 2. Known ligand-target interactions between 50 input drugs and 142 targets
Index	Target Name	Target Family	Uniprot ID	Gene Name	Drug Group	Drug Name	Confidence Score	Source
1	Progesterone receptor	Nuclear hormone receptors	P06401	PGR	Anabolic Steroids	Nandrolone	0.564	STITCH
2	Androgen receptor	Nuclear hormone receptors	P10275	AR	Anabolic Steroids	Nandrolone	0.735	STITCH
					Anabolic Steroids	Oxymetholone	1	DrugBank
					Anabolic Steroids	Oxandrolone	1	DrugBank
3	Natriuretic peptides B	Natriuretic peptide	P16860	NPPB	Anabolic Steroids	Oxymetholone	1	DrugBank
4	Cannabinoid receptor 2	5-hydroxytryptamine receptors	P34972	CNR2	Cannabinoids	Cannabinol	0.531	STITCH
					Cannabinoids	Dronabinol	1	DrugBank
					Cannabinoids	Anandamide	0.554	STITCH
					Cannabinoids	2-AG	0.737	STITCH
5	Cannabinoid receptor 1	Cannabinoid receptors	P21554	CNR1	Cannabinoids	2-AG	0.74	STITCH
					Cannabinoids	Cannabinol	0.571	STITCH
					Cannabinoids	Dronabinol	1	DrugBank
					Cannabinoids	Anandamide	0.845	STITCH
6	Transient receptor potential cation channel subfamily A member 1	Transient receptors	O75762	TRPA1	Cannabinoids	Cannabichromene	0.527	STITCH
					Cannabinoids	Cannabidiol	0.488	STITCH
					Cannabinoids	Dronabinol	0.416	STITCH
7	G-protein coupled receptor 55	Other GPCRs	Q9Y2T6	GPR55	Cannabinoids	Cannabidiol	0.419	STITCH
8	Solute carrier family 52, riboflavin transporter, member 2	Riboflavin transporter	Q9HAB3	SLC52A2	CNS Depressants	Gamma Hydroxybutyric Acid	1	DrugBank
9	Transmembrane domain-containing protein TMIGD3	Transmembrane domain-containing protein TMIGD3	P0DMS9	TMIGD3	CNS Depressants	Diazepam	0.651	STITCH
10	Acetylcholinesterase	Type-B carboxylesterase/lipases	P22303	ACHE	CNS Depressants	Diazepam	0.453	STITCH
11	Serum albumin	ALB/AFP/VDB	P02768	ALB	CNS Depressants	Diazepam	0.8	STITCH
12	Cholinesterase	Type-B carboxylesterase/lipases	P06276	BCHE	CNS Depressants	Diazepam	0.453	STITCH
13	Gamma-aminobutyric acid receptor subunit rho-3	GABA receptors	A8MPY1	GABRR3	CNS Depressants	Zolpidem	0.494	STITCH
					CNS Depressants	Triazolam	1	DrugBank
					CNS Depressants	Flunitrazepam	0.586	STITCH
					CNS Depressants	Diazepam	1	DrugBank
14	Gamma-aminobutyric acid receptor subunit rho-2	GABA receptors	P28476	GABRR2	CNS Depressants	Flunitrazepam	0.586	STITCH
					CNS Depressants	Zolpidem	0.494	STITCH
					CNS Depressants	Triazolam	1	DrugBank
					CNS Depressants	Diazepam	1	DrugBank
15	Gamma-aminobutyric acid receptor subunit rho-1	GABA receptors	P24046	GABRR1	CNS Depressants	Zolpidem	0.494	STITCH
					CNS Depressants	Triazolam	1	DrugBank
					CNS Depressants	Flunitrazepam	0.586	STITCH
					CNS Depressants	Diazepam	1	DrugBank
16	Translocator protein	TspO/BZRP	P30536	TSPO	CNS Depressants	Eszopiclone	1	DrugBank
					CNS Depressants	Diazepam	1	DrugBank
					CNS Depressants	Flunitrazepam	1	DrugBank
					CNS Depressants	Triazolam	1	DrugBank
					CNS Depressants	Zaleplon	1	DrugBank
					CNS Depressants	Lorazepam	1	DrugBank
17	Gamma-aminobutyric acid receptor subunit alpha-1	GABA receptors	P14867	GABRA1	CNS Depressants	Diazepam	1	DrugBank
					CNS Depressants	Flunitrazepam	0.586	STITCH
					CNS Depressants	Chlordiazepoxide	1	DrugBank
					CNS Depressants	Eszopiclone	1	DrugBank
					CNS Depressants	Glutethimide	1	DrugBank
					CNS Depressants	Zaleplon	1	DrugBank
					CNS Depressants	Zolpidem	1	DrugBank
					CNS Depressants	Lorazepam	1	DrugBank
					CNS Depressants	Alprazolam	1	DrugBank
					CNS Depressants	Triazolam	1	DrugBank
					CNS Depressants	Pentobarbital	1	DrugBank
18	Gamma-aminobutyric acid receptor subunit beta-1	GABA receptors	P18505	GABRB1	CNS Depressants	Flunitrazepam	0.586	STITCH
					CNS Depressants	Glutethimide	1	DrugBank
					CNS Depressants	Gamma Hydroxybutyric Acid	1	DrugBank
					CNS Depressants	Eszopiclone	1	DrugBank
					CNS Depressants	Chlordiazepoxide	1	DrugBank
					CNS Depressants	Diazepam	1	DrugBank
					CNS Depressants	Pentobarbital	1	DrugBank
					CNS Depressants	Triazolam	1	DrugBank
					CNS Depressants	Zolpidem	0.494	STITCH
					CNS Depressants	Lorazepam	1	DrugBank
					CNS Depressants	Alprazolam	1	DrugBank
19	Gamma-aminobutyric acid receptor subunit alpha-2	GABA receptors	P47869	GABRA2	CNS Depressants	Zolpidem	1	DrugBank
					CNS Depressants	Diazepam	1	DrugBank
					CNS Depressants	Lorazepam	1	DrugBank
					CNS Depressants	Chlordiazepoxide	1	DrugBank
					CNS Depressants	Eszopiclone	1	DrugBank
					CNS Depressants	Glutethimide	1	DrugBank
					CNS Depressants	Pentobarbital	1	DrugBank
					CNS Depressants	Alprazolam	1	DrugBank
					CNS Depressants	Triazolam	1	DrugBank
					CNS Depressants	Flunitrazepam	1	DrugBank
20	Gamma-aminobutyric acid receptor subunit alpha-3	GABA receptors	P34903	GABRA3	CNS Depressants	Glutethimide	1	DrugBank
					CNS Depressants	Alprazolam	1	DrugBank
					CNS Depressants	Lorazepam	1	DrugBank
					CNS Depressants	Zolpidem	1	DrugBank
					CNS Depressants	Chlordiazepoxide	1	DrugBank
					CNS Depressants	Eszopiclone	1	DrugBank
					CNS Depressants	Diazepam	1	DrugBank
					CNS Depressants	Flunitrazepam	1	DrugBank
					CNS Depressants	Pentobarbital	1	DrugBank
					CNS Depressants	Triazolam	1	DrugBank
21	Gamma-aminobutyric acid receptor subunit epsilon	GABA receptors	P78334	GABRE	CNS Depressants	Triazolam	1	DrugBank
					CNS Depressants	Pentobarbital	1	DrugBank
					CNS Depressants	Alprazolam	1	DrugBank
					CNS Depressants	Glutethimide	1	DrugBank
					CNS Depressants	Eszopiclone	1	DrugBank
					CNS Depressants	Zolpidem	0.641	STITCH
					CNS Depressants	Flunitrazepam	0.586	STITCH
					CNS Depressants	Chlordiazepoxide	1	DrugBank
					CNS Depressants	Diazepam	1	DrugBank
					CNS Depressants	Lorazepam	1	DrugBank
22	Gamma-aminobutyric acid receptor subunit beta-3	GABA receptors	P28472	GABRB3	CNS Depressants	Zolpidem	0.494	STITCH
					CNS Depressants	Diazepam	1	DrugBank
					CNS Depressants	Flunitrazepam	0.586	STITCH
					CNS Depressants	Glutethimide	1	DrugBank
					CNS Depressants	Lorazepam	1	DrugBank
					CNS Depressants	Alprazolam	1	DrugBank
					CNS Depressants	Chlordiazepoxide	1	DrugBank
					CNS Depressants	Eszopiclone	1	DrugBank
					CNS Depressants	Triazolam	1	DrugBank
					CNS Depressants	Pentobarbital	1	DrugBank
23	Gamma-aminobutyric acid receptor subunit beta-2	GABA receptors	P47870	GABRB2	CNS Depressants	Flunitrazepam	0.586	STITCH
					CNS Depressants	Glutethimide	1	DrugBank
					CNS Depressants	Pentobarbital	1	DrugBank
					CNS Depressants	Alprazolam	1	DrugBank
					CNS Depressants	Triazolam	1	DrugBank
					CNS Depressants	Zolpidem	0.494	STITCH
					CNS Depressants	Lorazepam	1	DrugBank
					CNS Depressants	Diazepam	1	DrugBank
					CNS Depressants	Chlordiazepoxide	1	DrugBank
					CNS Depressants	Eszopiclone	1	DrugBank
24	Gamma-aminobutyric acid receptor subunit delta	GABA receptors	O14764	GABRD	CNS Depressants	Chlordiazepoxide	1	DrugBank
					CNS Depressants	Diazepam	1	DrugBank
					CNS Depressants	Triazolam	1	DrugBank
					CNS Depressants	Pentobarbital	1	DrugBank
					CNS Depressants	Flunitrazepam	0.586	STITCH
					CNS Depressants	Zolpidem	0.494	STITCH
					CNS Depressants	Alprazolam	1	DrugBank
					CNS Depressants	Lorazepam	1	DrugBank
					CNS Depressants	Glutethimide	1	DrugBank
					CNS Depressants	Eszopiclone	1	DrugBank
25	Gamma-aminobutyric acid receptor subunit pi	GABA receptors	O00591	GABRP	CNS Depressants	Chlordiazepoxide	1	DrugBank
					CNS Depressants	Pentobarbital	1	DrugBank
					CNS Depressants	Diazepam	1	DrugBank
					CNS Depressants	Flunitrazepam	0.586	STITCH
					CNS Depressants	Zolpidem	0.494	STITCH
					CNS Depressants	Triazolam	1	DrugBank
					CNS Depressants	Lorazepam	1	DrugBank
					CNS Depressants	Alprazolam	1	DrugBank
					CNS Depressants	Glutethimide	1	DrugBank
					CNS Depressants	Eszopiclone	1	DrugBank
26	Gamma-aminobutyric acid receptor subunit alpha-5	GABA receptors	P31644	GABRA5	CNS Depressants	Diazepam	1	DrugBank
					CNS Depressants	Pentobarbital	1	DrugBank
					CNS Depressants	Flunitrazepam	1	DrugBank
					CNS Depressants	Triazolam	1	DrugBank
					CNS Depressants	Zolpidem	0.433	STITCH
					CNS Depressants	Lorazepam	1	DrugBank
					CNS Depressants	Alprazolam	1	DrugBank
					CNS Depressants	Glutethimide	1	DrugBank
					CNS Depressants	Eszopiclone	1	DrugBank
					CNS Depressants	Chlordiazepoxide	1	DrugBank
27	Gamma-aminobutyric acid receptor subunit alpha-6	GABA receptors	Q16445	GABRA6	CNS Depressants	Eszopiclone	1	DrugBank
					CNS Depressants	Chlordiazepoxide	1	DrugBank
					CNS Depressants	Alprazolam	1	DrugBank
					CNS Depressants	Pentobarbital	1	DrugBank
					CNS Depressants	Triazolam	1	DrugBank
					CNS Depressants	Glutethimide	1	DrugBank
					CNS Depressants	Lorazepam	1	DrugBank
					CNS Depressants	Diazepam	1	DrugBank
					CNS Depressants	Flunitrazepam	1	DrugBank
28	Gamma-aminobutyric acid receptor subunit alpha-4	GABA receptors	P48169	GABRA4	CNS Depressants	Lorazepam	1	DrugBank
					CNS Depressants	Flunitrazepam	1	DrugBank
					CNS Depressants	Chlordiazepoxide	1	DrugBank
					CNS Depressants	Eszopiclone	1	DrugBank
					CNS Depressants	Glutethimide	1	DrugBank
					CNS Depressants	Alprazolam	1	DrugBank
					CNS Depressants	Pentobarbital	1	DrugBank
					CNS Depressants	Triazolam	1	DrugBank
					CNS Depressants	Diazepam	1	DrugBank
29	Gamma-aminobutyric acid receptor subunit theta	GABA receptors	Q9UN88	GABRQ	CNS Depressants	Pentobarbital	1	DrugBank
					CNS Depressants	Chlordiazepoxide	1	DrugBank
					CNS Depressants	Triazolam	1	DrugBank
					CNS Depressants	Eszopiclone	1	DrugBank
					CNS Depressants	Glutethimide	1	DrugBank
					CNS Depressants	Alprazolam	1	DrugBank
					CNS Depressants	Lorazepam	1	DrugBank
					CNS Depressants	Diazepam	1	DrugBank
30	Gamma-aminobutyric acid receptor subunit gamma-1	GABA receptors	Q8N1C3	GABRG1	CNS Depressants	Chlordiazepoxide	1	DrugBank
					CNS Depressants	Diazepam	1	DrugBank
					CNS Depressants	Lorazepam	1	DrugBank
					CNS Depressants	Pentobarbital	1	DrugBank
					CNS Depressants	Alprazolam	1	DrugBank
					CNS Depressants	Glutethimide	1	DrugBank
					CNS Depressants	Triazolam	1	DrugBank
					CNS Depressants	Eszopiclone	1	DrugBank
31	Gamma-aminobutyric acid receptor subunit gamma-2	GABA receptors	P18507	GABRG2	CNS Depressants	Lorazepam	1	DrugBank
					CNS Depressants	Triazolam	1	DrugBank
					CNS Depressants	Diazepam	1	DrugBank
					CNS Depressants	Pentobarbital	1	DrugBank
					CNS Depressants	Chlordiazepoxide	1	DrugBank
					CNS Depressants	Eszopiclone	1	DrugBank
					CNS Depressants	Glutethimide	1	DrugBank
					CNS Depressants	Alprazolam	1	DrugBank
32	Gamma-aminobutyric acid receptor subunit gamma-3	GABA receptors	Q99928	GABRG3	CNS Depressants	Pentobarbital	1	DrugBank
					CNS Depressants	Triazolam	1	DrugBank
					CNS Depressants	Diazepam	1	DrugBank
					CNS Depressants	Lorazepam	1	DrugBank
					CNS Depressants	Chlordiazepoxide	1	DrugBank
					CNS Depressants	Eszopiclone	1	DrugBank
					CNS Depressants	Glutethimide	1	DrugBank
					CNS Depressants	Alprazolam	1	DrugBank
33	Bromodomain-containing protein 4	Bromodomain-containing protein 4	O60885	BRD4	CNS Depressants	Alprazolam	0.8	STITCH
34	Delta-type opioid receptor	Opioid receptors	P41143	OPRD1	Hallucinogens	Ketamine	1	DrugBank
					Hallucinogens	Dextromethorphan	1	DrugBank
					Opioids	Loperamide	1	DrugBank
					Opioids	Morphine	1	DrugBank
					Opioids	Hydrocodone	1	DrugBank
					Opioids	Methadone	1	DrugBank
					Opioids	Fentanyl	1	DrugBank
					Opioids	Hydromorphone	1	DrugBank
					Opioids	Oxymorphone	1	DrugBank
					Opioids	Codeine	1	DrugBank
					Opioids	Heroin	1	DrugBank
					Opioids	Buprenorphine	1	DrugBank
					Opioids	Oxycodone	1	DrugBank
35	Mu-type opioid receptor	Opioid receptors	P35372	OPRM1	Hallucinogens	Ketamine	1	DrugBank
					Hallucinogens	Dextromethorphan	1	DrugBank
					Opioids	Loperamide	1	DrugBank
					Opioids	Buprenorphine	1	DrugBank
					Opioids	Oxymorphone	1	DrugBank
					Opioids	Hydrocodone	1	DrugBank
					Opioids	Meperidine	0.578	STITCH
					Opioids	Codeine	1	DrugBank
					Opioids	Heroin	1	DrugBank
					Opioids	Morphine	1	DrugBank
					Opioids	Hydromorphone	1	DrugBank
					Opioids	Methadone	1	DrugBank
					Opioids	Fentanyl	1	DrugBank
					Opioids	Oxycodone	1	DrugBank
36	Kappa-type opioid receptor	Opioid receptors	P41145	OPRK1	Hallucinogens	Dextromethorphan	1	DrugBank
					Hallucinogens	Ketamine	1	DrugBank
					Opioids	Fentanyl	1	DrugBank
					Opioids	Hydromorphone	1	DrugBank
					Opioids	Morphine	1	DrugBank
					Opioids	Oxymorphone	0.475	STITCH
					Opioids	Loperamide	1	DrugBank
					Opioids	Methadone	0.678	STITCH
					Opioids	Oxycodone	1	DrugBank
					Opioids	Buprenorphine	1	DrugBank
					Opioids	Heroin	1	DrugBank
					Opioids	Codeine	1	DrugBank
37	Nociceptin receptor	Nociceptin receptor	P41146	OPRL1	Opioids	Morphine	0.618	STITCH
					Opioids	Buprenorphine	0.631	STITCH
38	Voltage-dependent P/Q-type calcium channel subunit alpha-1A	Potassium channels	O00555	CACNA1A	Opioids	Loperamide	1	DrugBank
39	Pro-opiomelanocortin	POMC	P01189	POMC	Opioids	Loperamide	1	DrugBank
40	Alpha-1-acid glycoprotein 2	Lipocalins	P19652	ORM2	Opioids	Oxycodone	1	DrugBank
41	Alpha-1-acid glycoprotein 1	Lipocalins	P02763	ORM1	Opioids	Oxycodone	1	DrugBank
42	Dopamine D3 receptor	Dopamine receptors	P35462	DRD3	CNS Depressants	Promethazine	0.459	STITCH
					Hallucinogens	Lysergic Acid Diethylamide	0.625	STITCH
43	5-hydroxytryptamine receptor 6	Other GPCRs	P50406	HTR6	Hallucinogens	Lysergic Acid Diethylamide	0.855	STITCH
					Hallucinogens	Psilocin	0.572	STITCH
					Hallucinogens	Dimethyltryptamine	1	DrugBank
					Hallucinogens	Psilocybin	0.47	STITCH
44	5-hydroxytryptamine receptor 5A	Other GPCRs	P47898	HTR5A	Hallucinogens	Psilocin	0.57	STITCH
					Hallucinogens	Lysergic Acid Diethylamide	0.717	STITCH
45	5-hydroxytryptamine receptor 7	Other GPCRs	P34969	HTR7	Hallucinogens	Psilocin	0.627	STITCH
					Hallucinogens	Lysergic Acid Diethylamide	0.885	STITCH
46	5-hydroxytryptamine receptor 1E	5-hydroxytryptamine receptors	P28566	HTR1E	Hallucinogens	Psilocybin	0.527	STITCH
					Hallucinogens	Psilocin	0.573	STITCH
					Hallucinogens	Ketamine	1	DrugBank
					Hallucinogens	Lysergic Acid Diethylamide	0.476	STITCH
47	5-hydroxytryptamine receptor 1A	5-hydroxytryptamine receptors	P08908	HTR1A	Hallucinogens	Lysergic Acid Diethylamide	1	DrugBank
					Hallucinogens	Psilocin	0.574	STITCH
					Hallucinogens	Ketamine	1	DrugBank
48	5-hydroxytryptamine receptor 1D	5-hydroxytryptamine receptors	P28221	HTR1D	Hallucinogens	Psilocin	0.576	STITCH
					Hallucinogens	Ketamine	1	DrugBank
					Hallucinogens	Lysergic Acid Diethylamide	0.748	STITCH
49	5-hydroxytryptamine receptor 1B	5-hydroxytryptamine receptors	P28222	HTR1B	Hallucinogens	Ketamine	1	DrugBank
					Hallucinogens	Psilocin	0.528	STITCH
50	5-hydroxytryptamine receptor 1F	5-hydroxytryptamine receptors	P30939	HTR1F	Hallucinogens	Ketamine	1	DrugBank
51	Substance-P receptor	Substance-P receptor	P25103	TACR1	Hallucinogens	Ketamine	1	DrugBank
52	5-hydroxytryptamine receptor 2A	5-hydroxytryptamine receptors	P28223	HTR2A	CNS Depressants	Promethazine	1	DrugBank
					Hallucinogens	Psilocybin	0.549	STITCH
					Hallucinogens	Mescaline	0.531	STITCH
					Hallucinogens	Ketamine	1	DrugBank
					Hallucinogens	Dimethyltryptamine	1	DrugBank
					Hallucinogens	Lysergic Acid Diethylamide	0.919	STITCH
					Hallucinogens	Psilocin	0.813	STITCH
					Hallucinogens	Midomafetamine	1	DrugBank
53	5-hydroxytryptamine receptor 2C	5-hydroxytryptamine receptors	P28335	HTR2C	CNS Depressants	Promethazine	0.812	STITCH
					Hallucinogens	Ketamine	1	DrugBank
					Hallucinogens	Midomafetamine	1	DrugBank
					Hallucinogens	Psilocin	0.778	STITCH
					Hallucinogens	Psilocybin	0.6	STITCH
					Hallucinogens	Lysergic Acid Diethylamide	0.667	STITCH
					Hallucinogens	Mescaline	0.492	STITCH
54	5-hydroxytryptamine receptor 2B	5-hydroxytryptamine receptors	P41595	HTR2B	CNS Depressants	Promethazine	0.594	STITCH
					Hallucinogens	Lysergic Acid Diethylamide	0.621	STITCH
					Hallucinogens	Ketamine	1	DrugBank
					Hallucinogens	Psilocin	0.699	STITCH
					Hallucinogens	Midomafetamine	1	DrugBank
					Hallucinogens	Psilocybin	0.637	STITCH
55	Muscarinic acetylcholine receptor M1	Muscarinic acetylcholine receptors	P11229	CHRM1	CNS Depressants	Promethazine	1	DrugBank
					CNS Stimulants	Cocaine	1	DrugBank
					Hallucinogens	Ketamine	1	DrugBank
56	Muscarinic acetylcholine receptor M2	Muscarinic acetylcholine receptors	P08172	CHRM2	CNS Depressants	Promethazine	1	DrugBank
					CNS Stimulants	Cocaine	1	DrugBank
					Hallucinogens	Ketamine	1	DrugBank
57	Muscarinic acetylcholine receptor M3	Muscarinic acetylcholine receptors	P20309	CHRM3	CNS Depressants	Promethazine	1	DrugBank
					Hallucinogens	Ketamine	1	DrugBank
58	Muscarinic acetylcholine receptor M4	Muscarinic acetylcholine receptors	P08173	CHRM4	CNS Depressants	Promethazine	1	DrugBank
					Hallucinogens	Ketamine	1	DrugBank
59	Muscarinic acetylcholine receptor M5	Muscarinic acetylcholine receptors	P08912	CHRM5	CNS Depressants	Promethazine	1	DrugBank
					Hallucinogens	Ketamine	1	DrugBank
60	D(2) dopamine receptor	Dopamine receptors	P14416	DRD2	CNS Depressants	Promethazine	1	DrugBank
					CNS Stimulants	Amphetamine	1	DrugBank
					Hallucinogens	Ketamine	1	DrugBank
					Hallucinogens	Lysergic Acid Diethylamide	0.452	STITCH
61	Histamine H4 receptor	Histamine receptors	Q9H3N8	HRH4	CNS Depressants	Promethazine	0.545	STITCH
62	Histamine H1 receptor	Histamine receptors	P35367	HRH1	CNS Depressants	Promethazine	1	DrugBank
					Hallucinogens	Psilocin	0.411	STITCH
63	Alpha-1B adrenergic receptor	Adrenergic receptors	P35368	ADRA1B	CNS Depressants	Promethazine	0.466	STITCH
					CNS Stimulants	Phendimetrazine	1	DrugBank
					CNS Stimulants	Amphetamine	1	DrugBank
64	Alpha-1A adrenergic receptor	Adrenergic receptors	P35348	ADRA1A	CNS Depressants	Promethazine	1	DrugBank
					CNS Stimulants	Phendimetrazine	1	DrugBank
					CNS Stimulants	Amphetamine	1	DrugBank
65	Alpha-1D adrenergic receptor	Adrenergic receptors	P25100	ADRA1D	CNS Depressants	Promethazine	0.711	STITCH
					CNS Stimulants	Amphetamine	1	DrugBank
66	Beta-1 adrenergic receptor	Adrenergic receptors	P08588	ADRB1	CNS Stimulants	Amphetamine	1	DrugBank
					Hallucinogens	Lysergic Acid Diethylamide	0.439	STITCH
67	Beta-3 adrenergic receptor	Adrenergic receptors	P13945	ADRB3	CNS Stimulants	Amphetamine	1	DrugBank
68	Beta-2 adrenergic receptor	Adrenergic receptors	P07550	ADRB2	CNS Stimulants	Amphetamine	1	DrugBank
69	Cocaine- and amphetamine-regulated transcript protein	CART	Q16568	CARTPT	CNS Stimulants	Amphetamine	1	DrugBank
70	Sodium-dependent serotonin transporter	Sodium neurotransmitter symporters	P31645	SLC6A4	CNS Stimulants	Methamphetamine	1	DrugBank
					CNS Stimulants	Amphetamine	1	DrugBank
					CNS Stimulants	Methylphenidate	1	DrugBank
					CNS Stimulants	Cocaine	1	DrugBank
					Hallucinogens	Dextromethorphan	1	DrugBank
					Hallucinogens	Midomafetamine	1	DrugBank
					Opioids	Methadone	0.503	STITCH
71	Sodium-dependent dopamine transporter	Sodium neurotransmitter symporters	Q01959	SLC6A3	CNS Stimulants	Methamphetamine	1	DrugBank
					CNS Stimulants	Phenmetrazine	1	DrugBank
					CNS Stimulants	Methylphenidate	1	DrugBank
					CNS Stimulants	Amphetamine	1	DrugBank
					CNS Stimulants	Cocaine	1	DrugBank
					Hallucinogens	Midomafetamine	1	DrugBank
					Opioids	Methadone	0.41	STITCH
72	Sodium-dependent noradrenaline transporter	Sodium neurotransmitter symporters	P23975	SLC6A2	CNS Stimulants	Phenmetrazine	1	DrugBank
					CNS Stimulants	Cocaine	1	DrugBank
					CNS Stimulants	Phendimetrazine	1	DrugBank
					CNS Stimulants	Amphetamine	1	DrugBank
					CNS Stimulants	Methylphenidate	1	DrugBank
					CNS Stimulants	Methamphetamine	1	DrugBank
					Hallucinogens	Ketamine	1	DrugBank
					Hallucinogens	Dextromethorphan	1	DrugBank
					Hallucinogens	Midomafetamine	1	DrugBank
					Opioids	Methadone	0.41	STITCH
73	Amine oxidase [flavin-containing] A	Flavin monoamine oxidases	P21397	MAOA	CNS Stimulants	Methamphetamine	1	DrugBank
74	Chromaffin granule amine transporter	Vesicular transporters	P54219	SLC18A1	CNS Stimulants	Methamphetamine	1	DrugBank
75	Alpha-2B adrenergic receptor	Adrenergic receptors	P18089	ADRA2B	CNS Depressants	Promethazine	0.622	STITCH
					CNS Stimulants	Methamphetamine	1	DrugBank
					CNS Stimulants	Amphetamine	1	DrugBank
76	Alpha-2A adrenergic receptor	Adrenergic receptors	P08913	ADRA2A	CNS Depressants	Promethazine	0.452	STITCH
					CNS Stimulants	Amphetamine	1	DrugBank
					CNS Stimulants	Methamphetamine	1	DrugBank
77	Alpha-2C adrenergic receptor	Adrenergic receptors	P18825	ADRA2C	CNS Depressants	Promethazine	0.417	STITCH
					CNS Stimulants	Amphetamine	1	DrugBank
					CNS Stimulants	Methamphetamine	1	DrugBank
78	Amine oxidase [flavin-containing] B	Flavin monoamine oxidases	P27338	MAOB	CNS Stimulants	Methamphetamine	1	DrugBank
					CNS Stimulants	Amphetamine	1	DrugBank
79	Trace amine-associated receptor 1	Other GPCRs	Q96RJ0	TAAR1	CNS Stimulants	Amphetamine	1	DrugBank
					CNS Stimulants	Methamphetamine	1	DrugBank
					Hallucinogens	Midomafetamine	0.464	STITCH
80	Synaptic vesicular amine transporter	Vesicular transporters	Q05940	SLC18A2	CNS Stimulants	Methamphetamine	1	DrugBank
					CNS Stimulants	Amphetamine	1	DrugBank
					Hallucinogens	Midomafetamine	1	DrugBank
81	Neuronal acetylcholine receptor subunit alpha-10	Acetylcholine receptors	Q9GZZ6	CHRNA10	CNS Stimulants	Cocaine	0.454	STITCH
					Opioids	Methadone	1	DrugBank
82	Xanthine dehydrogenase/oxidase [Includes: Xanthine dehydrogenase	Xanthine dehydrogenases	P47989	XDH	Opioids	Methadone	0.596	STITCH
83	Aldehyde oxidase	Xanthine dehydrogenases	Q06278	AOX1	Opioids	Methadone	0.596	STITCH
84	5-hydroxytryptamine receptor 3A	5-hydroxytryptamine receptors	P46098	HTR3A	Opioids	Methadone	1	DrugBank
85	Sigma non-opioid intracellular receptor 1	ERG2	Q99720	SIGMAR1	CNS Depressants	Promethazine	0.403	STITCH
					Hallucinogens	Dimethyltryptamine	1	DrugBank
					Hallucinogens	Phencyclidine	1	DrugBank
					Hallucinogens	Dextromethorphan	1	DrugBank
86	Lysosomal Pro-X carboxypeptidase	Peptidase S28	P42785	PRCP	Hallucinogens	Phencyclidine	0.548	STITCH
87	Glutamate receptor ionotropic, NMDA 3B	Glutamate-gated ion channels	O60391	GRIN3B	CNS Depressants	Pentobarbital	1	DrugBank
88	Glutamate receptor ionotropic, NMDA 2A	Glutamate-gated ion channels	Q12879	GRIN2A	CNS Depressants	Pentobarbital	1	DrugBank
89	Glutamate receptor ionotropic, NMDA 2B	Glutamate-gated ion channels	Q13224	GRIN2B	CNS Depressants	Pentobarbital	1	DrugBank
90	Glutamate receptor ionotropic, kainate 2	Glutamate-gated ion channels	Q13002	GRIK2	CNS Depressants	Pentobarbital	1	DrugBank
91	Glutamate receptor ionotropic, AMPA 2	Glutamate-gated ion channels	P42262	GRIA2	CNS Depressants	Pentobarbital	1	DrugBank
92	Glutamate receptor ionotropic, NMDA 2D	Glutamate-gated ion channels	O15399	GRIN2D	CNS Depressants	Pentobarbital	1	DrugBank
					Hallucinogens	Phencyclidine	0.412	STITCH
93	Glutamate receptor ionotropic, NMDA 2C	Glutamate-gated ion channels	Q14957	GRIN2C	CNS Depressants	Pentobarbital	1	DrugBank
					Hallucinogens	Phencyclidine	0.473	STITCH
94	Glutamate receptor ionotropic, NMDA 1	Glutamate-gated ion channels	Q05586	GRIN1	CNS Depressants	Pentobarbital	1	DrugBank
					Hallucinogens	Phencyclidine	0.425	STITCH
					Hallucinogens	Dextrorphan	0.453	STITCH
95	Glutamate receptor ionotropic, NMDA 3A	Glutamate-gated ion channels	Q8TCU5	GRIN3A	CNS Depressants	Pentobarbital	1	DrugBank
					Hallucinogens	Phencyclidine	1	DrugBank
					Hallucinogens	Ketamine	1	DrugBank
					Hallucinogens	Dextromethorphan	1	DrugBank
					Opioids	Methadone	1	DrugBank
96	Neuronal acetylcholine receptor subunit alpha-7	Acetylcholine receptors	P36544	CHRNA7	CNS Depressants	Pentobarbital	1	DrugBank
					CNS Stimulants	Cocaine	0.454	STITCH
					Hallucinogens	Dextromethorphan	1	DrugBank
97	Neuronal acetylcholine receptor subunit alpha-4	Acetylcholine receptors	P43681	CHRNA4	CNS Depressants	Pentobarbital	1	DrugBank
					CNS Stimulants	Cocaine	0.454	STITCH
					Hallucinogens	Dextromethorphan	1	DrugBank
98	Neuronal acetylcholine receptor subunit beta-4	Acetylcholine receptors	P30926	CHRNB4	CNS Stimulants	Cocaine	0.454	STITCH
					Hallucinogens	Dextromethorphan	1	DrugBank
99	Neuronal acetylcholine receptor subunit beta-2	Acetylcholine receptors	P17787	CHRNB2	CNS Stimulants	Cocaine	0.454	STITCH
					Hallucinogens	Dextromethorphan	1	DrugBank
100	Neuronal acetylcholine receptor subunit alpha-3	Acetylcholine receptors	P32297	CHRNA3	CNS Stimulants	Cocaine	0.454	STITCH
					Hallucinogens	Dextromethorphan	1	DrugBank
101	Neuronal acetylcholine receptor subunit alpha-2	Acetylcholine receptors	Q15822	CHRNA2	CNS Stimulants	Cocaine	0.454	STITCH
					Hallucinogens	Dextromethorphan	1	DrugBank
102	Neutrophil cytosol factor 1	Neutrophil cytosol factors	P14598	NCF1	Hallucinogens	Dextromethorphan	1	DrugBank
103	Cytochrome b-245 light chain	P22phox	P13498	CYBA	Hallucinogens	Dextromethorphan	1	DrugBank
104	Cytochrome b-245 heavy chain	Cytochrome b-245 heavy chain	P04839	CYBB	Hallucinogens	Dextromethorphan	1	DrugBank
105	Ras-related C3 botulinum toxin substrate 1	Rho	P63000	RAC1	Hallucinogens	Dextromethorphan	1	DrugBank
106	Ras-related C3 botulinum toxin substrate 2	Rho	P15153	RAC2	Hallucinogens	Dextromethorphan	1	DrugBank
107	Neutrophil cytosol factor 4	Neutrophil cytosol factors	Q15080	NCF4	Hallucinogens	Dextromethorphan	1	DrugBank
108	Neutrophil cytosol factor 2	Neutrophil cytosol factors	P19878	NCF2	Hallucinogens	Dextromethorphan	1	DrugBank
109	Membrane-associated progesterone receptor component 1	MAPR	O00264	PGRMC1	Hallucinogens	Dextromethorphan	1	DrugBank
110	5-hydroxytryptamine receptor 3C	5-hydroxytryptamine receptors	Q8WXA8	HTR3C	CNS Stimulants	Cocaine	0.5	STITCH
					Hallucinogens	Phencyclidine	0.417	STITCH
111	5-hydroxytryptamine receptor 3D	5-hydroxytryptamine receptors	Q70Z44	HTR3D	CNS Stimulants	Cocaine	0.5	STITCH
					Hallucinogens	Phencyclidine	0.417	STITCH
112	5-hydroxytryptamine receptor 3E	5-hydroxytryptamine receptors	A5X5Y0	HTR3E	CNS Stimulants	Cocaine	0.5	STITCH
					Hallucinogens	Phencyclidine	0.417	STITCH
113	5-hydroxytryptamine receptor 3B	5-hydroxytryptamine receptors	O95264	HTR3B	CNS Stimulants	Cocaine	0.5	STITCH
					Hallucinogens	Phencyclidine	0.417	STITCH
114	Potassium voltage-gated channel subfamily H member 2	Potassium channels	Q12809	KCNH2	CNS Stimulants	Cocaine	0.622	STITCH
					Opioids	Meperidine	0.447	STITCH
115	Sodium-dependent neutral amino acid transporter B	Sodium neurotransmitter symporters	Q96N87	SLC6A18	CNS Stimulants	Cocaine	0.437	STITCH
116	Sodium-dependent neutral amino acid transporter B	Sodium neurotransmitter symporters	Q695T7	SLC6A19	CNS Stimulants	Cocaine	0.437	STITCH
117	Sodium-dependent neutral amino acid transporter SLC6A17	Sodium neurotransmitter symporters	Q9H1V8	SLC6A17	CNS Stimulants	Cocaine	0.437	STITCH
118	Sodium- and chloride-dependent transporter XTRP3	Sodium neurotransmitter symporters	Q9NP91	SLC6A20	CNS Stimulants	Cocaine	0.437	STITCH
119	Sodium-dependent neutral amino acid transporter B	Sodium neurotransmitter symporters	Q9H2J7	SLC6A15	CNS Stimulants	Cocaine	0.437	STITCH
120	Neuronal acetylcholine receptor subunit alpha-9	Acetylcholine receptors	Q9UGM1	CHRNA9	CNS Stimulants	Cocaine	0.454	STITCH
121	Neuronal acetylcholine receptor subunit alpha-6	Acetylcholine receptors	Q15825	CHRNA6	CNS Stimulants	Cocaine	0.454	STITCH
122	Sodium- and chloride-dependent glycine transporter 2	Sodium neurotransmitter symporters	Q9Y345	SLC6A5	CNS Stimulants	Cocaine	0.449	STITCH
123	Sodium channel protein type 11 subunit alpha	Sodium channels	Q9UI33	SCN11A	CNS Stimulants	Cocaine	1	DrugBank
124	Sodium- and chloride-dependent neutral and basic amino acid transporter B	Sodium neurotransmitter symporters	Q9UN76	SLC6A14	CNS Stimulants	Cocaine	0.449	STITCH
125	Sodium channel protein type 10 subunit alpha	Sodium channels	Q9Y5Y9	SCN10A	CNS Stimulants	Cocaine	1	DrugBank
126	Sodium channel protein type 5 subunit alpha	Sodium channels	Q14524	SCN5A	CNS Stimulants	Cocaine	1	DrugBank
127	Sodium- and chloride-dependent GABA transporter 3	Sodium neurotransmitter symporters	P48066	SLC6A11	CNS Stimulants	Cocaine	0.449	STITCH
128	Sodium- and chloride-dependent betaine transporter	Sodium neurotransmitter symporters	P48065	SLC6A12	CNS Stimulants	Cocaine	0.449	STITCH
129	Sodium- and chloride-dependent GABA transporter 2	Sodium neurotransmitter symporters	Q9NSD5	SLC6A13	CNS Stimulants	Cocaine	0.449	STITCH
130	Sodium- and chloride-dependent taurine transporter	Sodium neurotransmitter symporters	P31641	SLC6A6	CNS Stimulants	Cocaine	0.449	STITCH
131	Sodium-dependent proline transporter	Sodium neurotransmitter symporters	Q99884	SLC6A7	CNS Stimulants	Cocaine	0.449	STITCH
132	Sodium- and chloride-dependent creatine transporter 1	Sodium neurotransmitter symporters	P48029	SLC6A8	CNS Stimulants	Cocaine	0.449	STITCH
133	Sodium- and chloride-dependent glycine transporter 1	Sodium neurotransmitter symporters	P48067	SLC6A9	CNS Stimulants	Cocaine	0.449	STITCH
134	Sodium- and chloride-dependent GABA transporter 1	Sodium neurotransmitter symporters	P30531	SLC6A1	CNS Stimulants	Cocaine	0.449	STITCH
135	Neuronal acetylcholine receptor subunit alpha-5	Acetylcholine receptors	P30532	CHRNA5	CNS Stimulants	Cocaine	0.454	STITCH
136	Acetylcholine receptor subunit beta	Acetylcholine receptors	P11230	CHRNB1	CNS Stimulants	Cocaine	0.454	STITCH
137	Neuronal acetylcholine receptor subunit beta-3	Acetylcholine receptors	Q05901	CHRNB3	CNS Stimulants	Cocaine	0.454	STITCH
138	Acetylcholine receptor subunit epsilon	Acetylcholine receptors	Q04844	CHRNE	CNS Stimulants	Cocaine	0.454	STITCH
139	Acetylcholine receptor subunit delta	Acetylcholine receptors	Q07001	CHRND	CNS Stimulants	Cocaine	0.454	STITCH
140	Acetylcholine receptor subunit gamma	Acetylcholine receptors	P07510	CHRNG	CNS Stimulants	Cocaine	0.454	STITCH
141	Acetylcholine receptor subunit alpha	Acetylcholine receptors	P02708	CHRNA1	CNS Stimulants	Cocaine	0.454	STITCH
142	Orphan sodium- and chloride-dependent neurotransmitter transporter NTT5	Sodium neurotransmitter symporters	Q9GZN6	SLC6A16	CNS Stimulants	Cocaine	0.424	STITCH
